# Supplementary material
Source: PubMed Central journal article supplement (PMC4310555)
Supplement: NIHMS577686-supplement-Elia_Supplementary.pdf [file NIHMS577686-supplement-Elia_Supplementary.pdf]

## Supplementary Information

# Genome Wide Copy Number Variation Study Associates Metabotropic Glutamate Receptor Gene Networks with Attention Deficit Hyperactivity Disorder

Josephine Elia, Joseph T. Glessner, Kai Wang, Nagahide Takahashi, Corina J. Shtir, Dexter Hadley, Patrick M.A. Sleiman, Haitao Zhang, Cecilia E. Kim, Reid Robison, Gholson J. Lyon, James H. Flory, Jonathan P. Bradfield, Marcin Imielinski, Cuiping Hou, Edward C. Frackelton, Rosetta M. Chiavacci, Takeshi Sakurai, Cara Rabin, Frank A. Middleton, Kelly A. Thomas, Maria Garris, Frank Mentch, Christine M. Freitag, Hans-Christoph Steinhausen, Alexandre A. Todorov, Andreas Reif, Aribert Rothenberger, Barbara Franke, Eric O. Mick, Herbert Roeyers, Jan Buitelaar, Klaus-Peter Lesch, Tobias Banaschewski, Richard P. Ebstein, Fernando Mulas, Robert D. Oades, Joseph Sergeant, Edmund Sonuga-Barke, Tobias J. Renner, Marcel Romanos, Jasmin Romanos, Andreas Warnke, Susanne Walitza, Jobst Meyer, Haukur Pálmason, Christiane Seitz, Sandra K. Loo, Susan L. Smalley, Joseph Biederman, Lindsey Kent, Philip Asherson, Richard J.L. Anney, J. William Gaynor, Philip Shaw, Marcella Devoto, Peter S. White, Struan F.A. Grant, Joseph D. Buxbaum, Judith L. Rapoport, Nigel M. Williams, Stanley F. Nelson, Stephen V. Faraone, Hakon Hakonarson

## Supplementary Note

### CNV Calls and Review of Significant Loci

No additional “CNV burden” was observed in cases vs. controls, rather the distribution of calls made was highly comparable (Supplementary Fig. 1). We established CNV call reliability in Illumina and Perlegen data by observing Mendelian patterns of inheritance. Trios were first verified by genotype inheritance and analyzed to establish the quality of CNV calls from both Illumina and Perlegen platforms based on observed inheritance. Based on all CNV calls called in trios from the Illumina CHOP data, 8,647 CNVs observed in offspring were inherited from a parent while 437 CNVs were putatively *de novo* which is a *de novo* rate of 4.811%. Based on all CNV calls called in trios from the Perlegen IMAGE data, 1,862 CNVs observed in offspring were inherited

from a parent while 505 CNVs were putatively *de novo* which is a *de novo* rate of 21.335%. 51 IMAGE cases, 22 deletion loci, and 5 duplication loci had multiple *de novo* events due to low data quality and were excluded as outliers; once excluded, 785 CNVs were inherited and 63 were *de novo* which lowered the observed *de novo* rate to an acceptable level of 7.429%. Based on CNVs observed in parents from Illumina CHOP data, 9,305 CNVs were passed to the child while 7,432 CNVs were not inherited resulting in a 55.595% inheritance rate. Based on all CNVs observed in parents from Perlegen IMAGE data, 2,114 CNVs were passed to the child while 3,789 CNVs were not inherited resulting in a 35.812% inheritance rate. We excluded 65 parent samples that were outliers with 20 or greater CNVs not inherited to offspring and filtering these samples out resulted in 1,204 CNVs were passed to the child while 1,221 were not inherited resulting in a 49.650% inheritance rate which established confidence in this CNV call set.

It is intractable to review all PennCNV calls and wasteful to exclude CNVs smaller than a size threshold. Instead, we statistically score the loci based on all CNVs detected and review these nominally associated CNVR loci for appropriate overlap, signal quality, and Mendelian inheritance. As in Table 1, all reported loci show at least one case with the CNV inherited from a parent, in cases where both parents were available.

In total, there are 3,506 cases and 13,327 controls, representing greater than a three-fold abundance of control samples to robustly define CNVs to be absent or at a lower frequency than case samples. Although the number of CNVs detected per sample was as high as 70, there are actually inferred normal diploid (CN=2) calls which make

every sample equivalent. These CNVs are very rare and thus the number of observed CNV calls will vary between samples.

### **Analysis of Genotype Call Genome-Wide Association**

Full scale genotype genome-wide association was performed and the genomic inflation factor (GIF) was at an acceptable level (GIF=1.02409). We also checked pairwise population concordance to check for and filter out cryptic relatedness which could give rise to rare CNVs specific to ultra-stratified subpopulations of Europe. We performed Transmission Disequilibrium Test (TDT) statistic using Plink on 397 ADHD cases with both parents on the CHOP Illumina HumanHap550 genotype data (Supplementary Table 3). The top result with more than one significant SNP in a region was chr4p12  $P(\text{rs1018199})=2.71 \times 10^{-5}$  and  $P(\text{rs11724347})=6.19 \times 10^{-5}$  which impacts *TEC*. We also performed a case:control genotype genome-wide association on 735 cases and 2,298 controls using the same Illumina data set (Supplementary Table 4). The strongest signal was chr19p12  $P(\text{rs2081051})=4.60 \times 10^{-6}$  and  $P(\text{rs399686})=4.72 \times 10^{-6}$  residing between *ZNF66* and *ZNF85*. Lastly, 623 ADHD cases with both parents on the IMAGE Perlegen 600K data were analyzed with TDT statistic (Supplementary Table 5). The most significant signal was chr5q23.1  $P(\text{rs17144308})=9.70 \times 10^{-6}$  and  $P(\text{rs2043053})=3.36 \times 10^{-5}$  which is 237 kb from the closest proximal gene *DTWD2*. Taken together, SNPs residing around exon 4 of contactin 3 (*CNTN3*) appear to replicate most consistently between Illumina and Perlegen ADHD TDT statistics. SNP rs12488030 is common to both platforms  $P=2.51 \times 10^{-3}$  Illumina and  $P=4.97 \times 10^{-3}$  Perlegen. There are two supporting SNPs in close proximity also showing significance Illumina:  $P(\text{rs4073942})=2.78 \times 10^{-3}$

and  $P(\text{rs9869828})=8.61 \times 10^{-3}$  in addition Perlegen:  $P(\text{rs11915713})=1.86 \times 10^{-5}$  and  
 $P(\text{rs7372975})=7.59 \times 10^{-5}$

**Supplementary Figures:**

**Supplementary Figure 1.** Distribution of CNV calls per individual cases (top panel) vs controls (bottom panel).

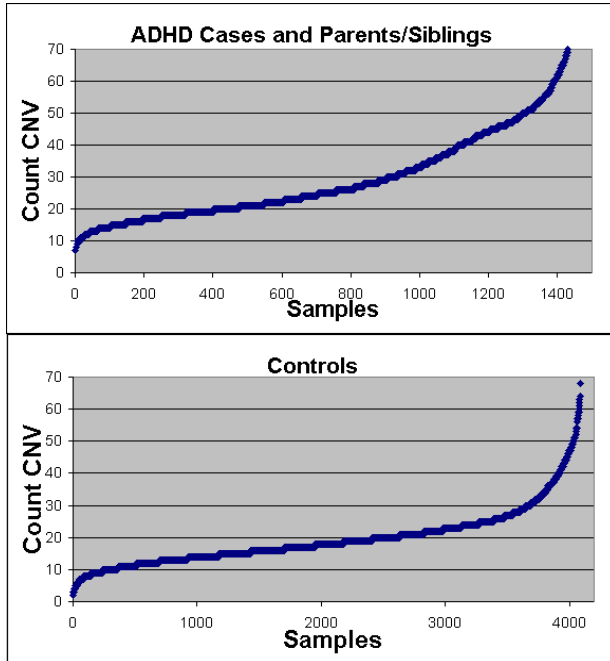

**Supplementary Figure 2.** Examples of CNV observance based on B-allele frequency (BAF) and Log R Ratio (LRR).

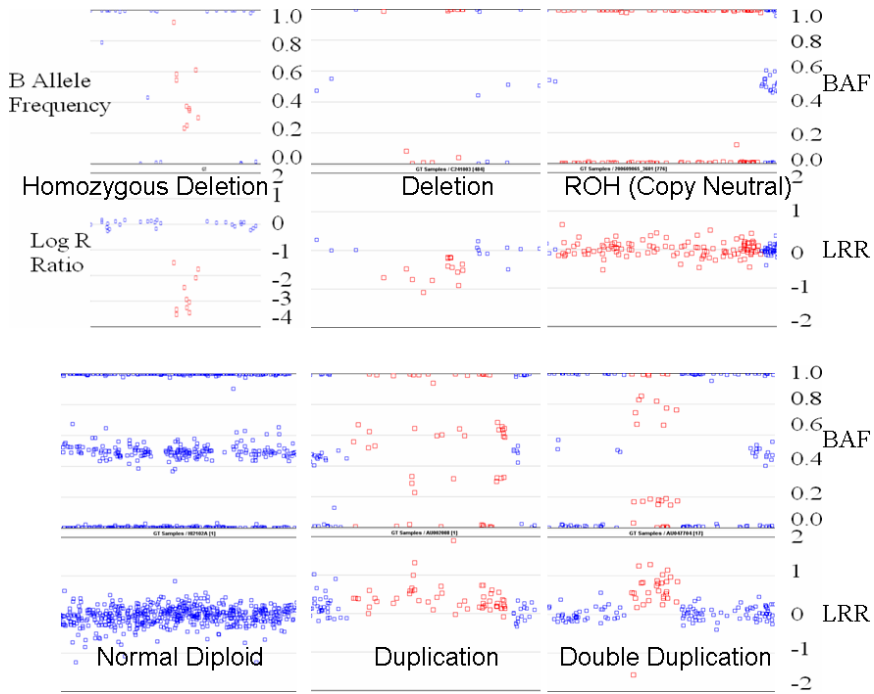

**Supplementary Figure 3.** Independent qPCR Validation of CHOP ADHD Case Discovery Cohort (Illumina Human Hap550).

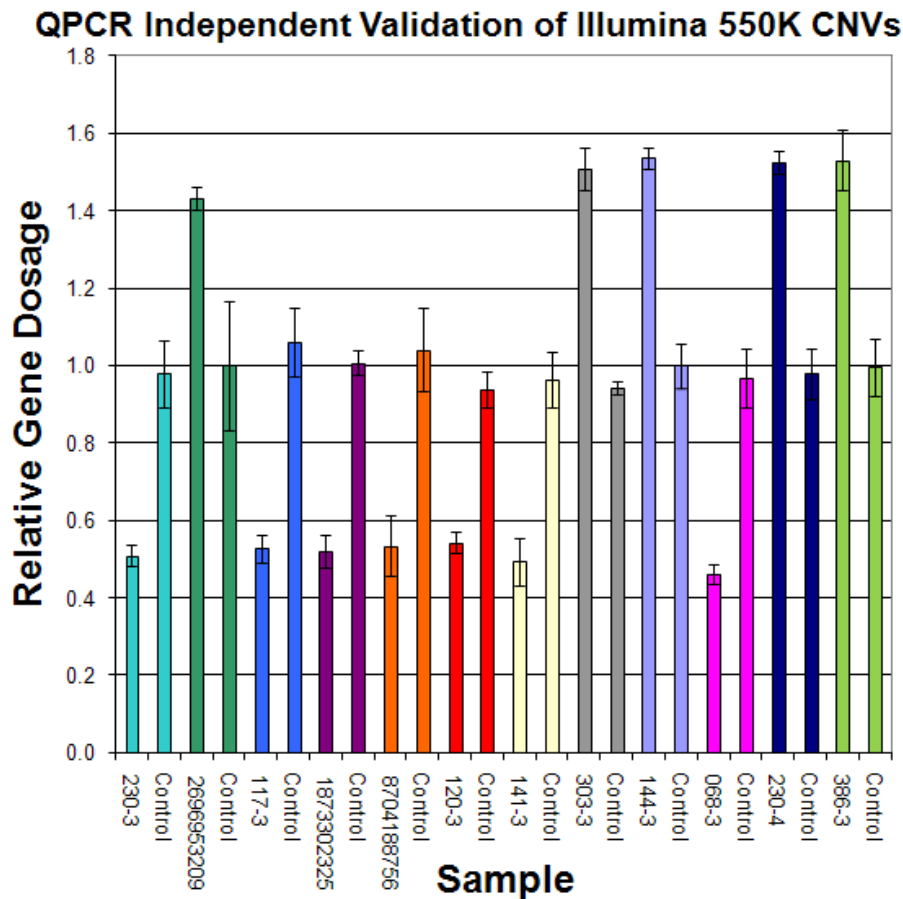

- 11q14.3 GRM5 Del; ■ 7q36.2 DPP6 Dup; ■ 5q12.3 SGTB/NLN Del; ■ 1p32.3 USP24 Del;
- 7q31.33 GRM8 Del; ■ 19q13.11 SLC7A10 Del; ■ 3p26.3 CNTN4 Del; ■ 4q25 LARP7 Dup;
- 2p12 CTNNA2 Dup; ■ 3p26.1 GRM7 Del; ■ 1p31.1 NEGR1 Dup; ■ 6q24.3 GRM1 Dup

Fluorescent probe-based qPCR assays using Roche Universal probe were designed to validate every candidate CNV with a completely independent test (representative series shown for each locus in case and control pairs). Error bars denote the standard deviation of quadruplicate runs. Del, deletion; Dup, duplication.

**Supplementary Figure 4.** Independent qPCR Validation of Controls Negative for CNVs

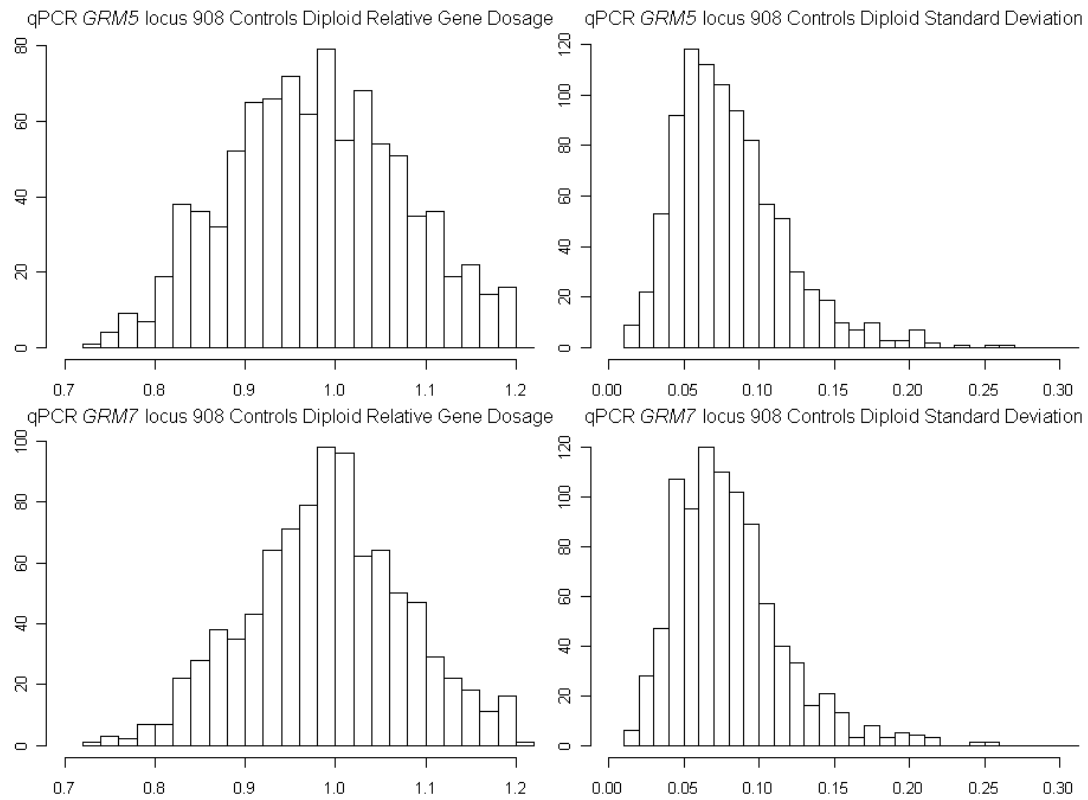

908 controls called for absence of CNV (diploid) by PennCNV in associated regions were screened by qPCR to limit the possibility of false negative calls. Controls were all confirmed to be diploid tightly distributed around one with low level of standard deviation.



**Supplementary Figure 5.** Independent qPCR Validation of Replication Cohorts ADHD Cases A) IMAGE (Perlegen 600k) B) PUWMa (Illumina 1M) C) IMAGE II (Affymetrix 5.0)

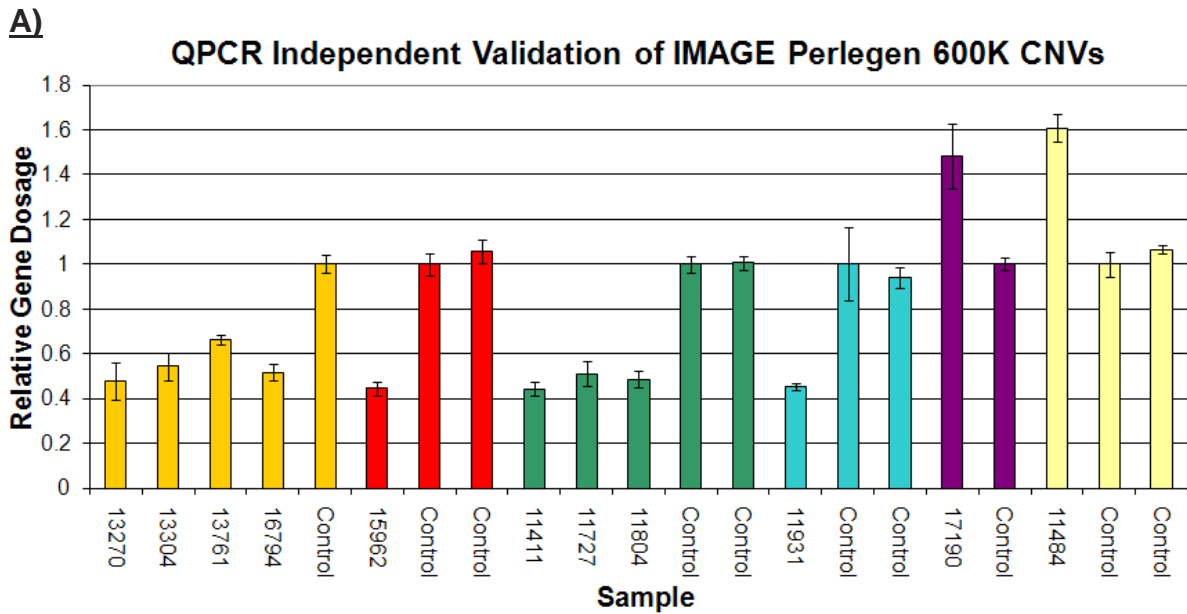

■ 11q14.3 GRM5 Del; ■ 5q12.3 SGTB/NLN Del; ■ 1p32.3 USP24 Del; ■ 19q13.11 SLC7A10 Del; ■ 4q25 LARP7 Dup; ■ 2p12 CTNNA2 Dup. Samples in IMAGE/NIMH not available: 17580 (11q14.3), 1135 (7q36.2).

Fluorescent probe-based qPCR assays using Roche Universal probe were designed to validate every candidate CNV with a completely independent test (11 of the 14 IMAGE samples with replicating CNV calls for the loci reported were available for validation and all validated in comparison with control pairs; the other 3 loci were visually validated – see Supplementary Figures 6 and 7). Error bars denote the standard deviation of quadruplicate runs. Del: deletion; Dup: duplication.

**B)**

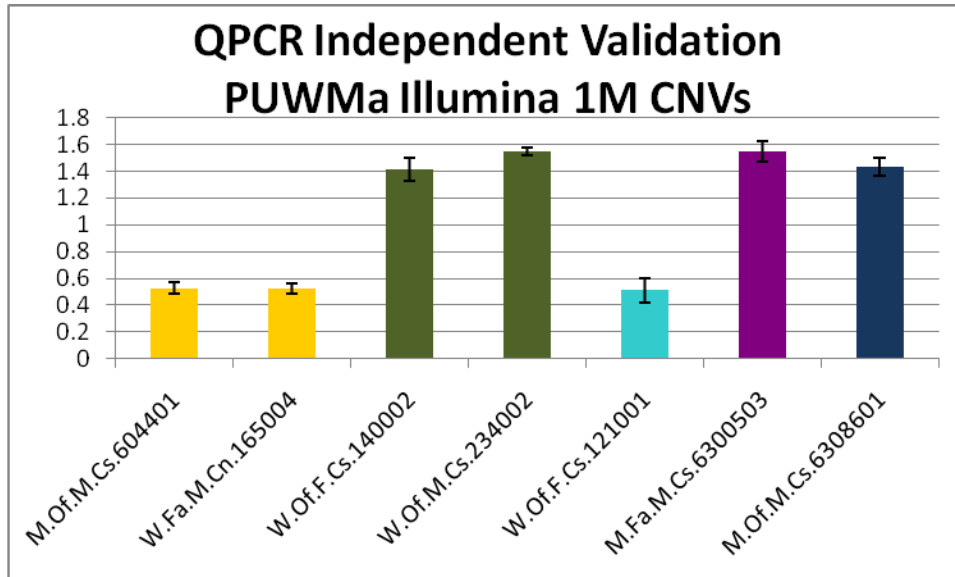

■ 11q14.3 GRM5 Del; ■ 7q36.2 DPP6 Dup; ■ 19q13.11 SLC7A10 Del; ■ 4q25 LARP7 Dup; ■ 1p31.1 NEGR1 Dup;

**C)**

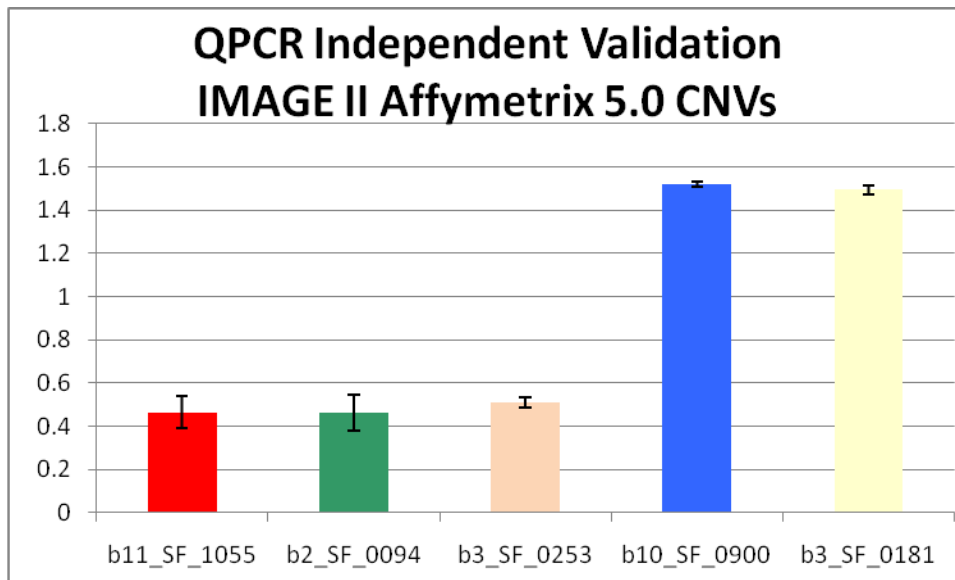

■ 5q12.3 SGTB/NLN Del; ■ 1p32.3 USP24 Del; ■ 3p26.3 CNTN4 Del; ■ 2p12 CTNNA2 Dup; ■ 6q24.3 GRM1 Dup

**Supplementary Figure 6.** Normalized SNP Level Perlegen 600K Data. The X axis shows base pair position in Megabases on chromosome 11. Raw SNP Level Data Showing GRM5 Deletion in five samples from IMAGE Perlegen 600K Data Normalized by Adapted PennCNV-Affy Protocol. Genotype data termed B-allele frequency (BAF) and intensity data termed Log R Ratio (LRR) plotted.

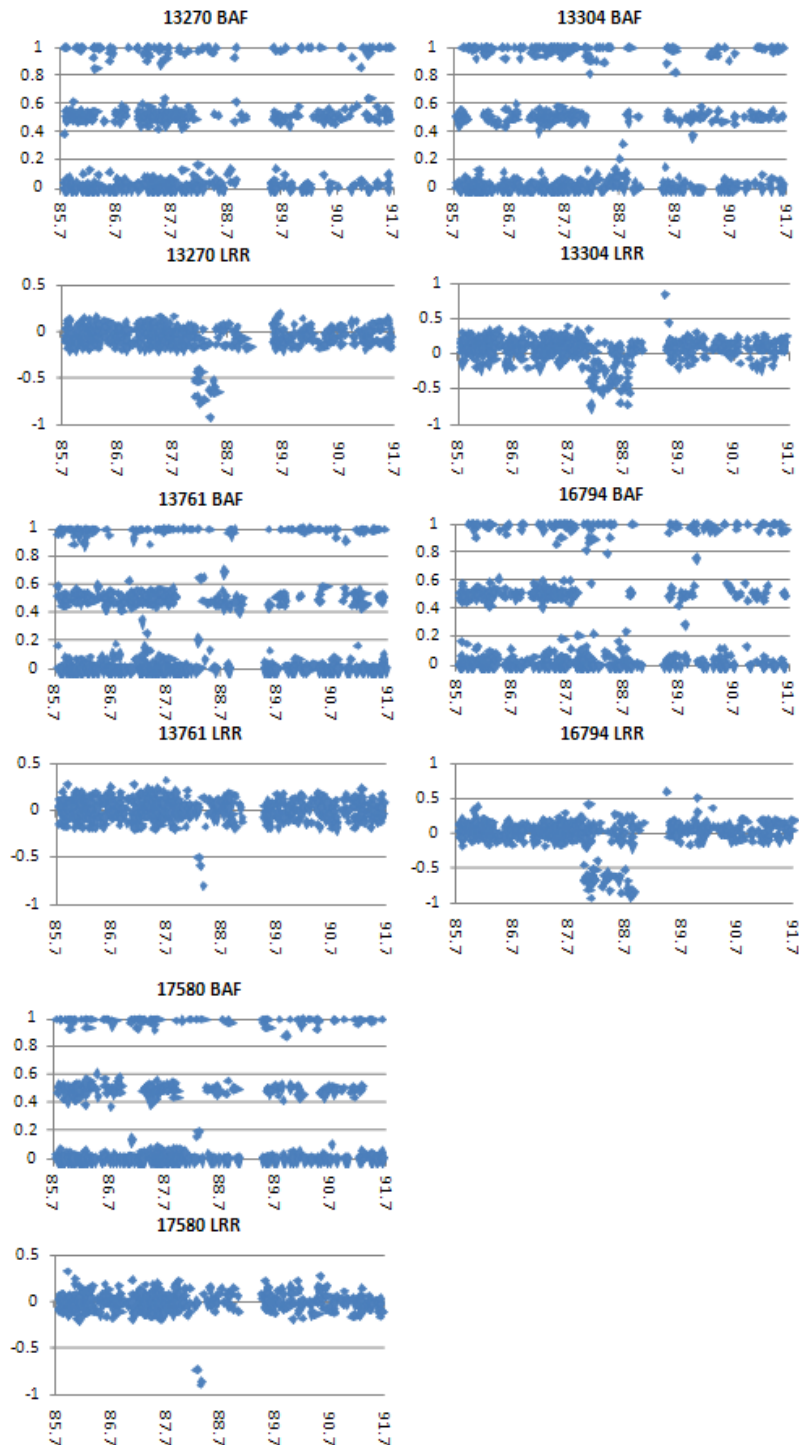

**Supplementary Figure 7A** Full SNP-Level Normalized Perlegen 600K Data.

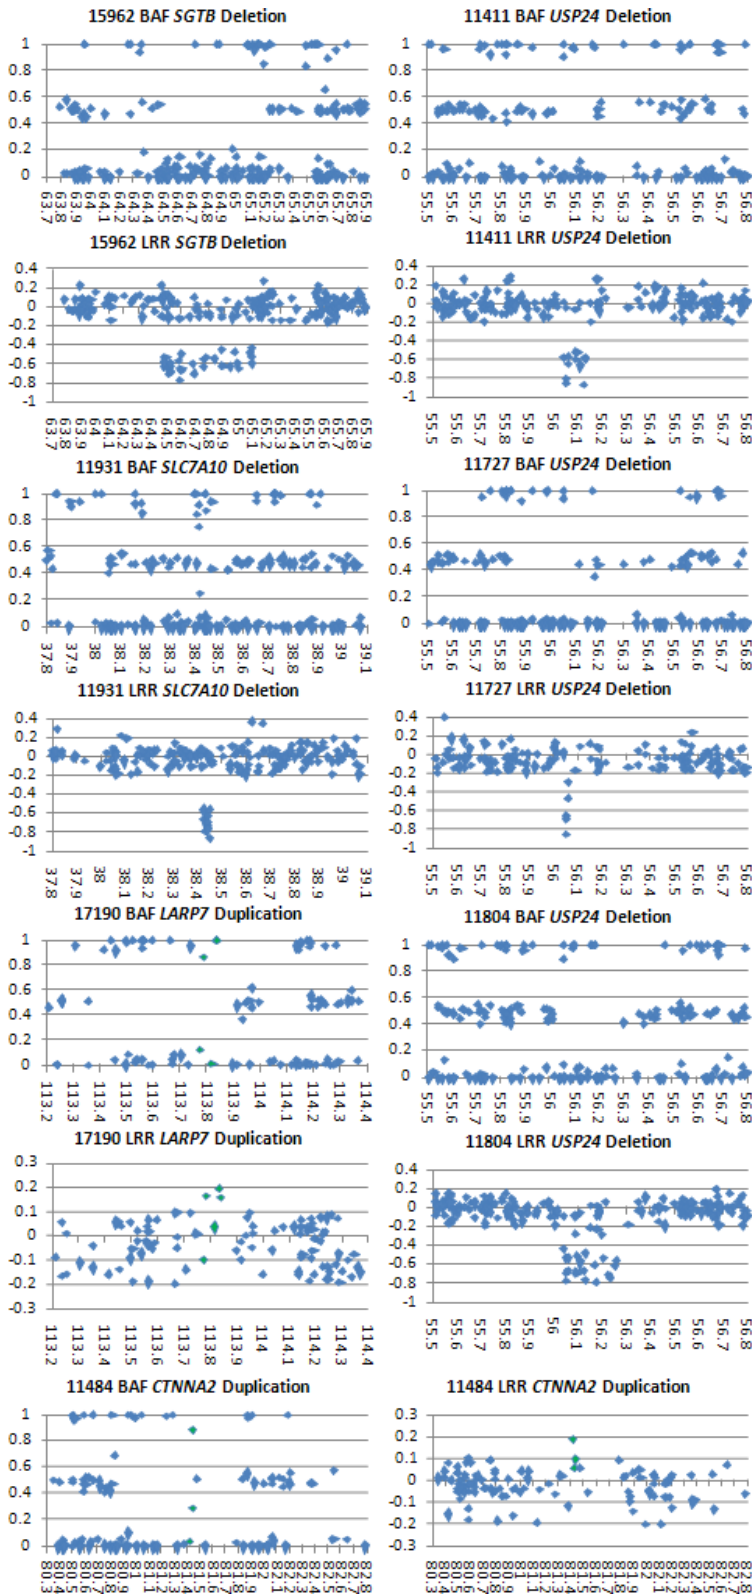

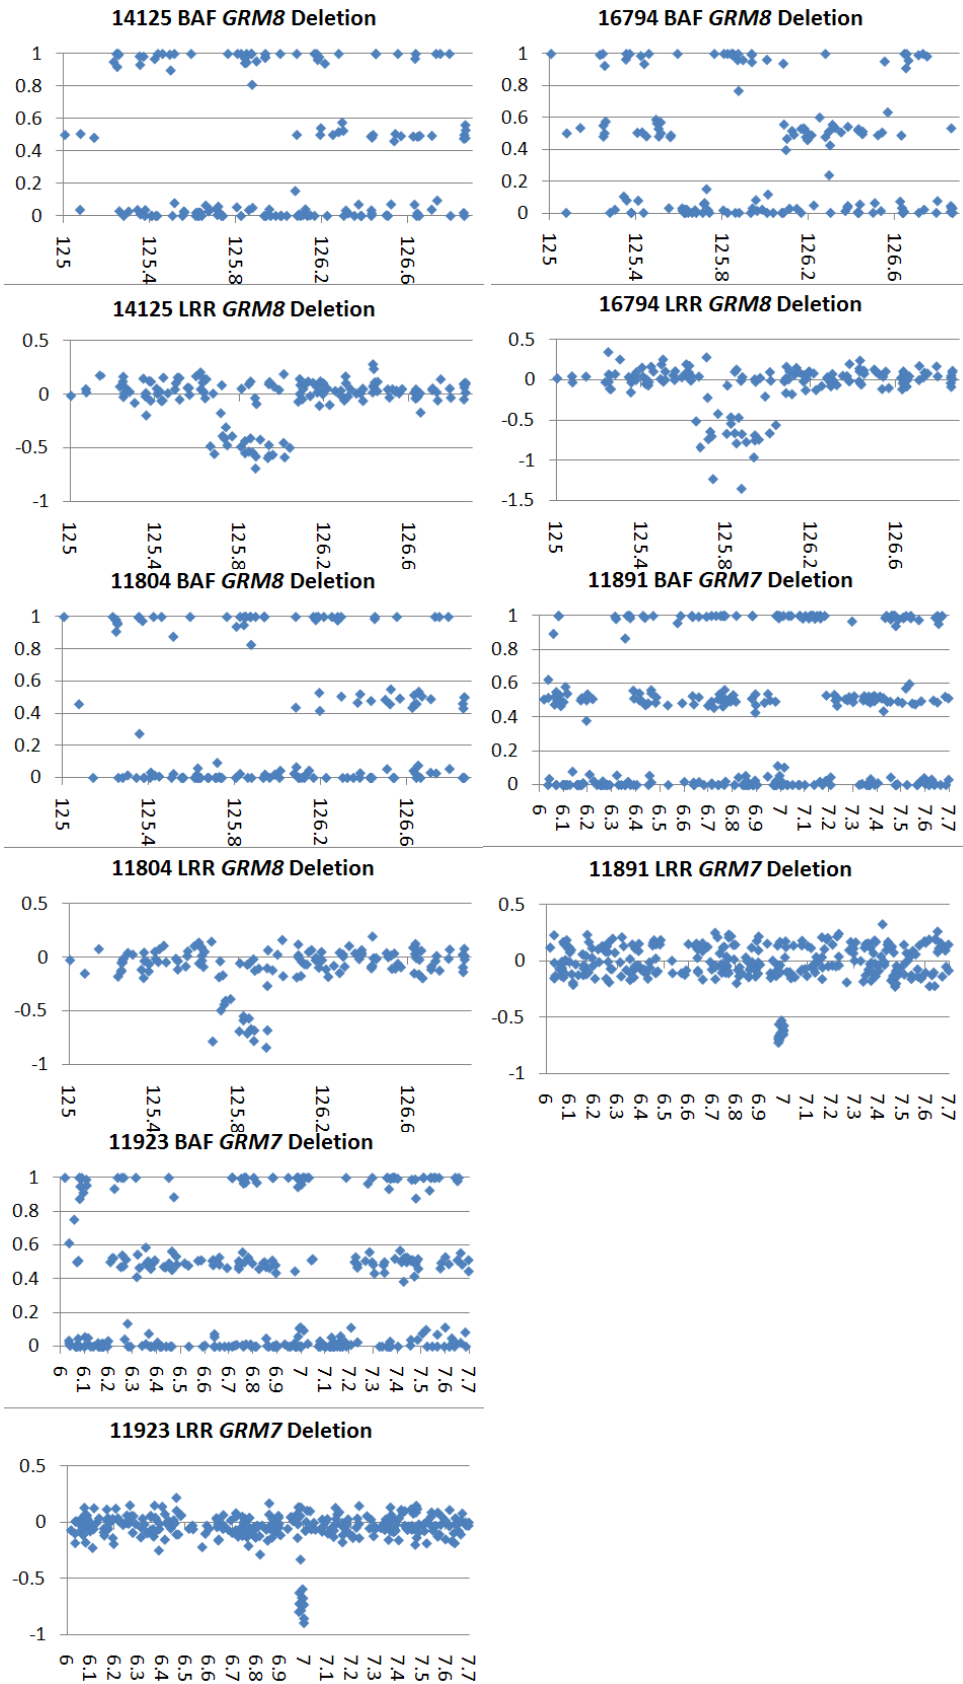

**Supplementary Figure 7B.** Full SNP-Level Normalized Illumina 1M PUWMA Data.

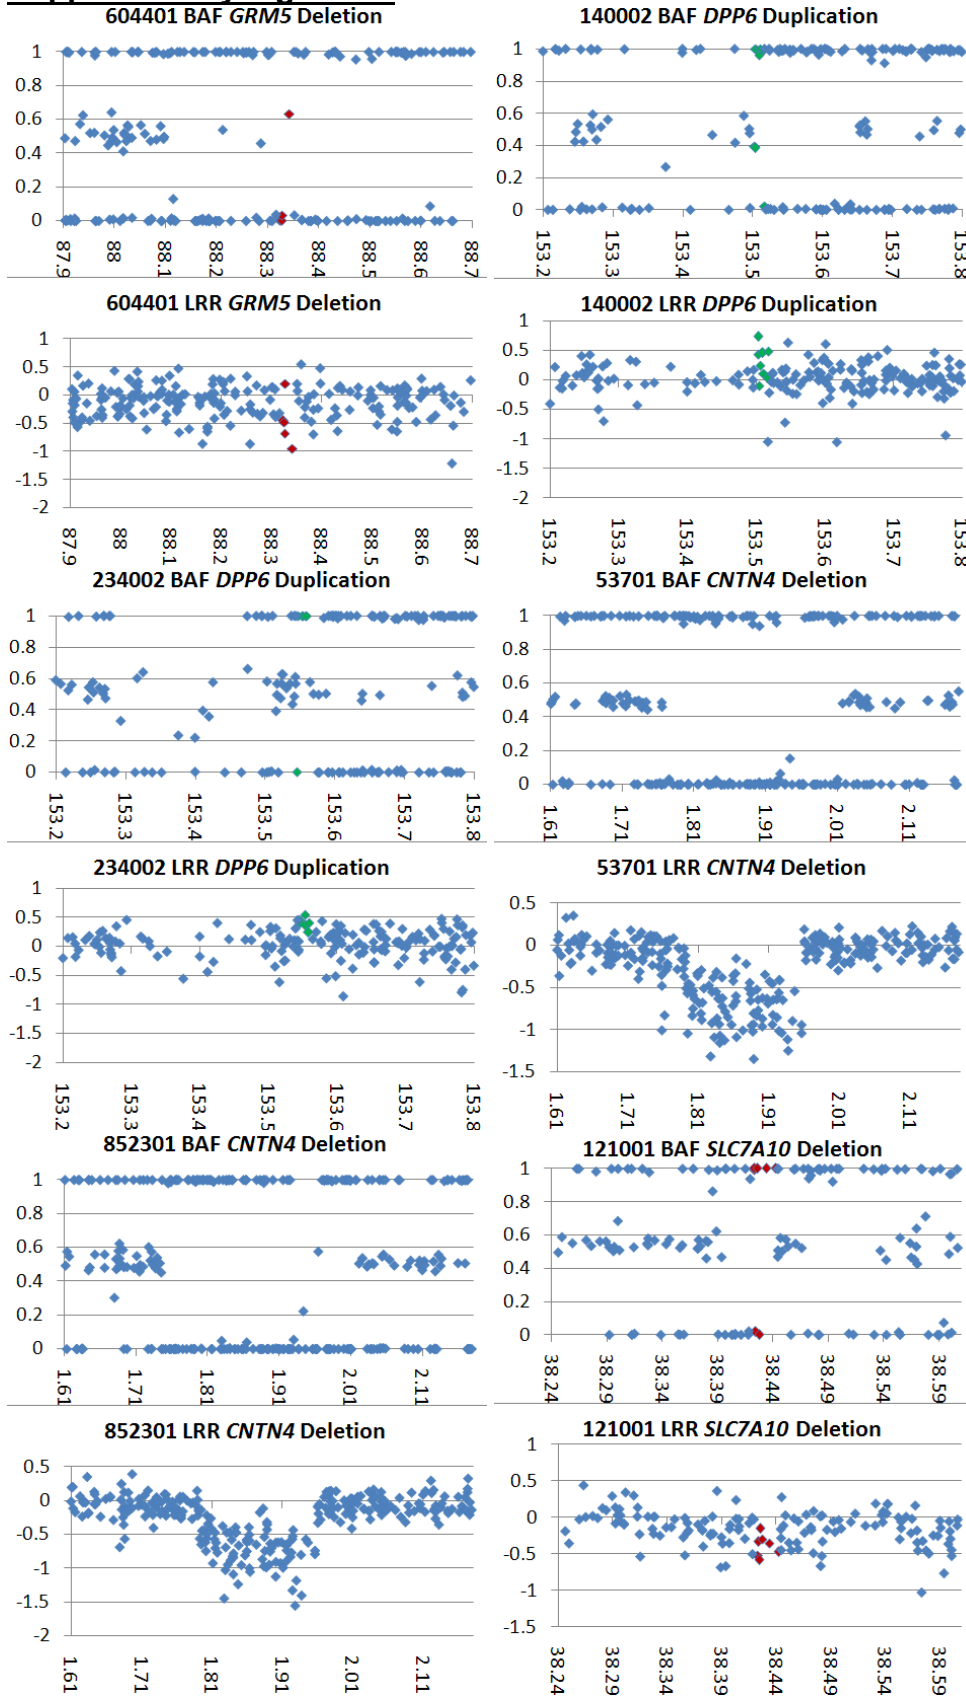

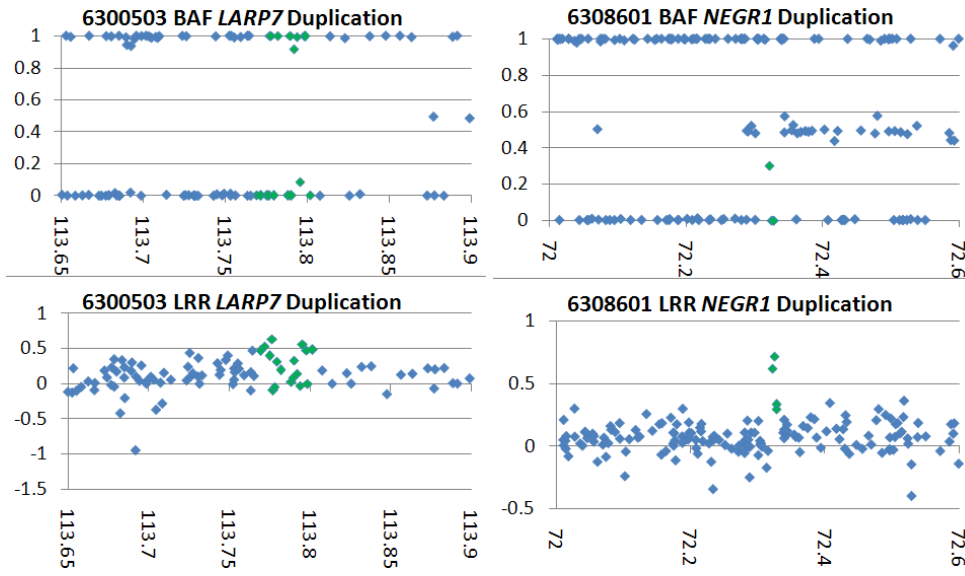

**Supplementary Figure 7C.** Full SNP-Level Normalized Affymetrix 5.0 IMAGE II Data.

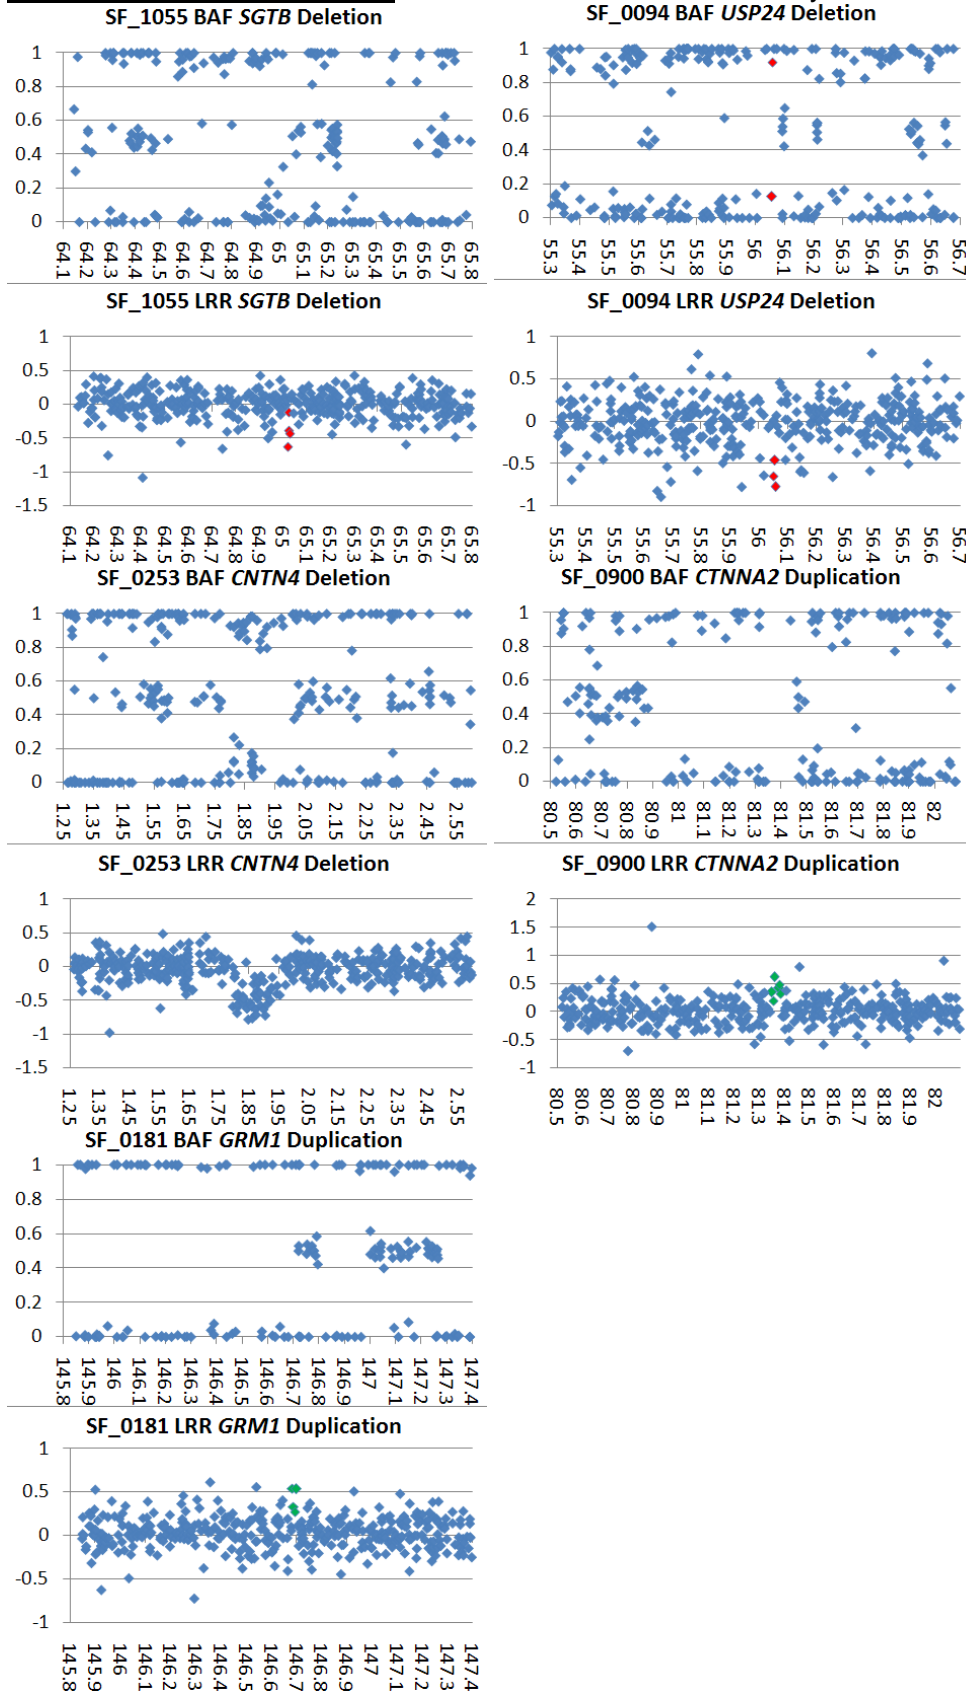



**Supplementary Figure 8.** Intelligence Quotient (IQ) ADHD Population Distribution. IQ measures in the ADHD subjects ranged from 70-155, with mean IQ of 103). ADHD subjects with GRM CNV (*GRM5*, *GRM7* and *GRM8* deletions *GRM1* duplication) are inserted in red color showing normal distribution across the ADHD cohort.

**Full Scale I.Q. (prorated) Red Lines: GRM CNV Subjects**

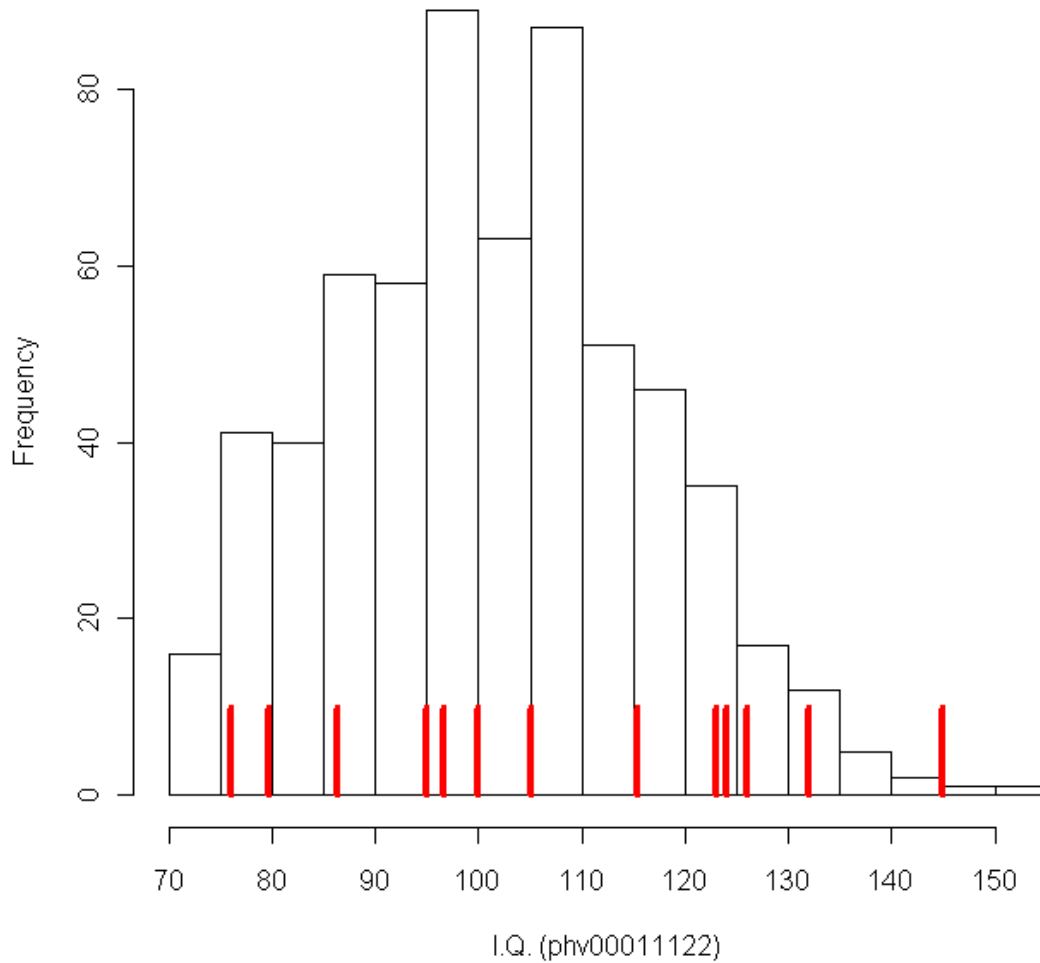

**Supplementary Figure 9.** Eigenstrat Principle Components Analysis. Cases and Controls were simultaneously analyzed to minimize population substructure in case control CNV association. Samples deviating from the Caucasian cluster shown were removed. The genomic inflation factor (GIF) within Plink was at an acceptable level (GIF=1.02409). We also checked pairwise population concordance to check for and filter out cryptic relatedness which could give rise to rare CNVs specific to ultra-stratified subpopulations of Europe.

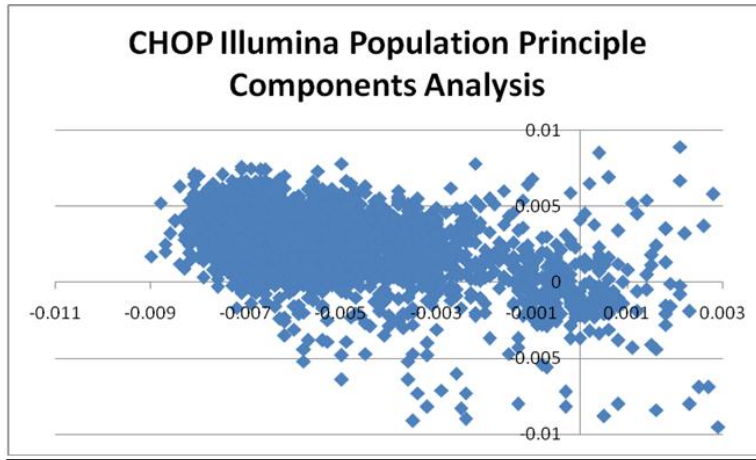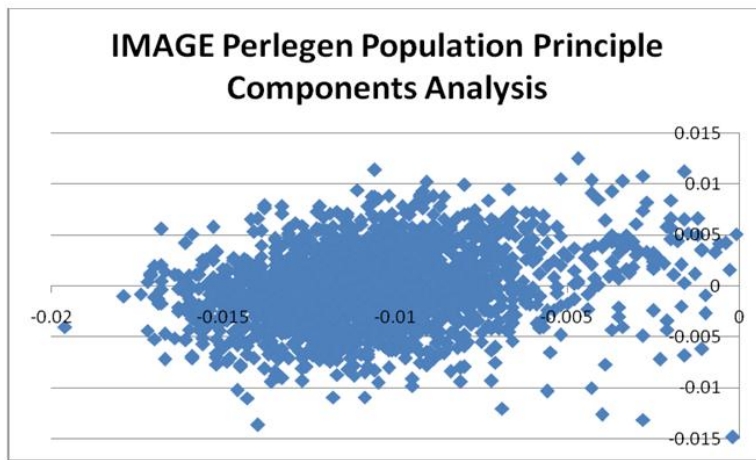

**Supplementary Figure 10.** Example of the SNP-based statistics applied and the resulting highest significance region Called. Examples from chr 3 are shown; A) 1,327,963-2,376,095 and B) 1,847,000-1,862,261. Complex CNV overlap is simplified by producing SNP-based statistics. As seen in plots for cases deleted and controls deleted, each SNP has a specific number of CNVs. The cases and controls are compared with a Fisher's exact test and the negative log p value is shown in the third plot. Regions of significance ranging within a power of ten are reported and the region of highest significance (local minimum p-value) within 1MB is reported. The IMAGE cases deleted plot shows only one case sample #11939 since the remaining red regions 3' are parents.

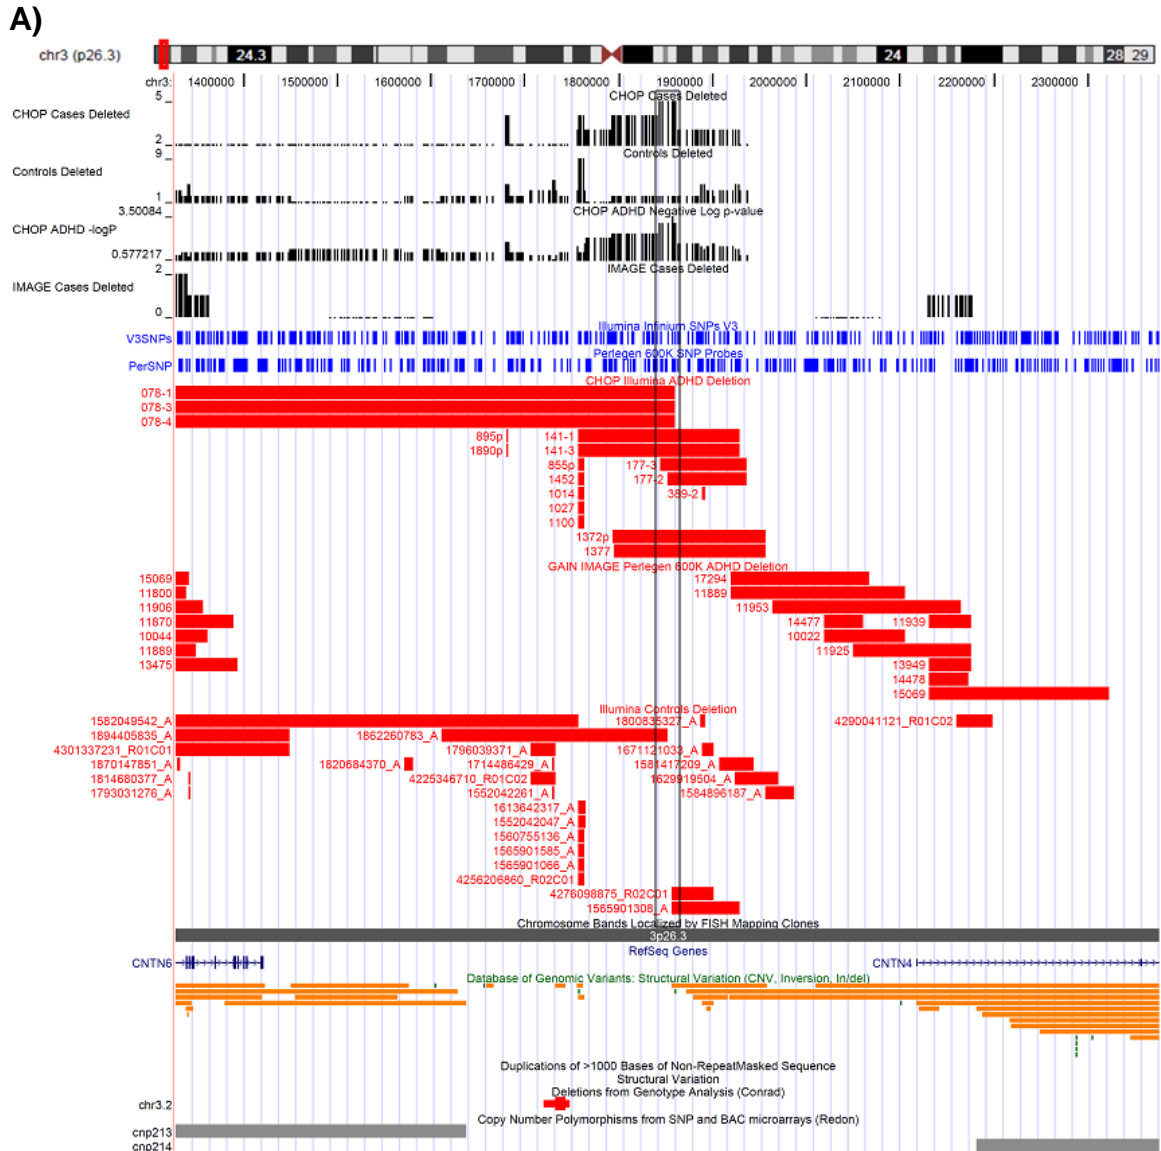

B)

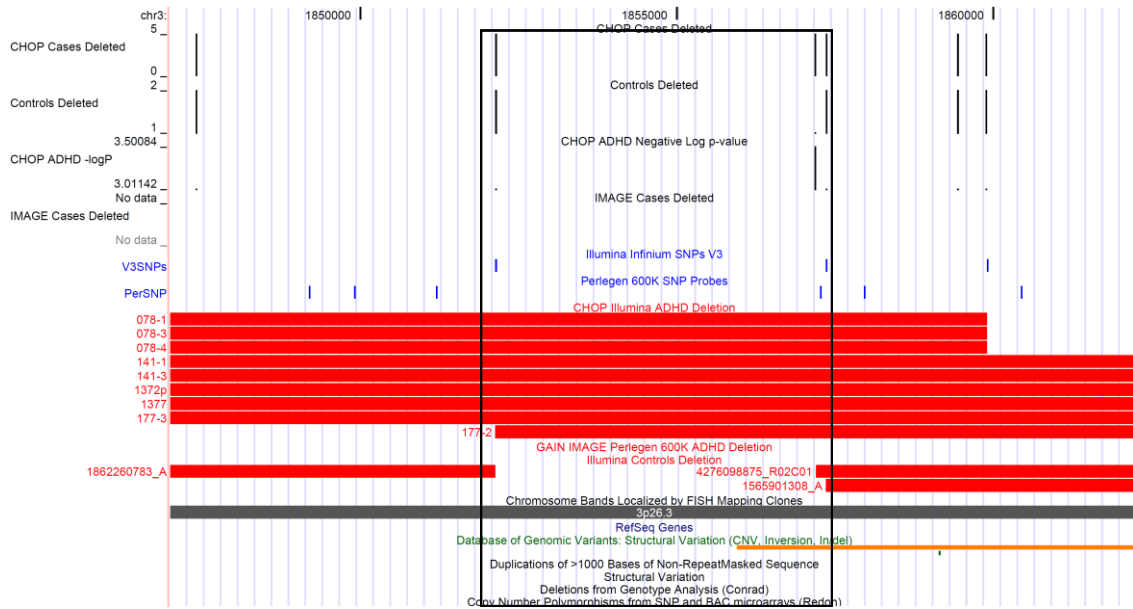

**Supplementary Figure 11.** CNV peninsula false positive association example. An example from chr 2 is shown (location 51,777,616-51,784,033). All significant CNVRs are reviewed for CNV peninsulas indicating uncertainty in boundary truncation.

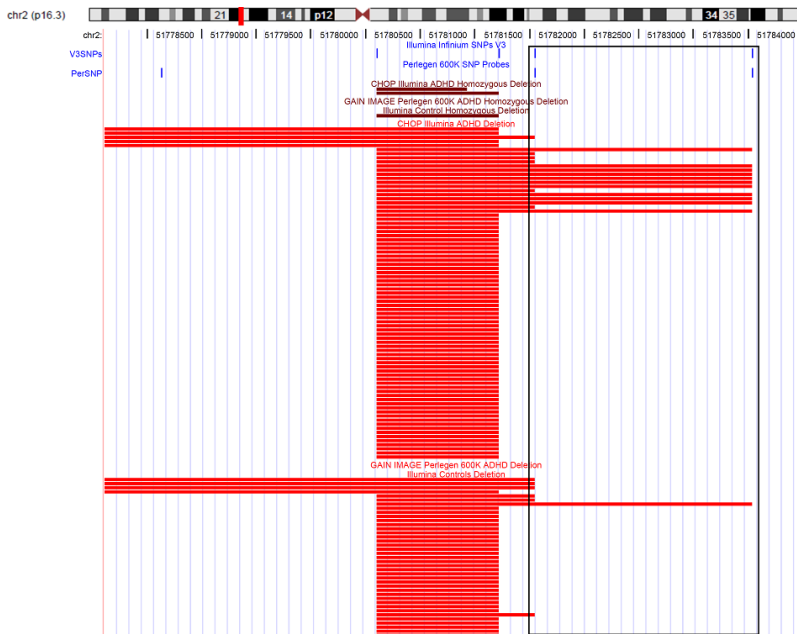

## **Supplementary Tables**

**Supplementary Table 1.** Clinical Demographics of Study Participants.

| <b>ADHD Cohort</b>  | <b>N</b> | <b>ADHD subjects<br/>Age range</b> | <b>Ancestry</b> | <b>ADHD<br/>ascertainment</b>                                                      |
|---------------------|----------|------------------------------------|-----------------|------------------------------------------------------------------------------------|
| CHOP ADHD trios     | 349      | 6-18                               | European        | K-SADS-IVR                                                                         |
| CHOP ADHD cases     | 664      | 6-18                               | European        | Clinical ADHD diagnosis & treatment with ADHD meds; K-SADS-IVR on majority         |
| NIMH ADHD trios     | 128      | 6-12                               | European        | DICA; Conners Scales                                                               |
| UTAH cases          | 90       | 19-60                              | European        | WRAADDs, WURS, PRS, strict DSM-IV criteria, including age of onset before 7        |
| IMAGE ADHD trios    | 642      | 6-17                               | European        | PACS, Conners, SDQ, WISC                                                           |
| IMAGE II ADHD trios | 787      | 5-14                               | European        | K-SADS German version, Kinder-DIPS, Conners parent and teacher scales, WISC, K-ABC |
| PUWMA trios         | 864      | 6-18                               | European        | K-SADS                                                                             |

PACS: Parental Account of Child Symptoms; Conners: Behavioral rating scales; SDQ: Strength and Difficulties Questionnaire; WISC: Wechsler Intelligence Scale for Children (WISC-IV); KSADS-IVR: Schedule for Affective Disorders and Schizophrenia for School-Age Children-IVR; DICA: Diagnostic Interview for Children and Adolescents; Kinder-DIPS: Diagnostic Interview for Psychiatric Disorders in Children, K-ABC: Kaufman-ABC intelligence scale. WRAADDs=Wender-Reimherr Adult Attention Deficit Disorder Scale; WURS=Wender Utah Rating Scale; PRS=Parent Rating Scale.

**Supplementary Table 2.** K-SADS ADHD Severity of of CHOP Study Participants in Inattentive, Impulsive, and Hyperactive Domains.

| Diagnostic Criteria        | Score 1 | Score 2 | Score 3 | Score 4 |
|----------------------------|---------|---------|---------|---------|
| Often Careless             | 7       | 40      | 372     | 81      |
| Loses Things               | 18      | 126     | 277     | 79      |
| Difficulty Finishing       | 16      | 90      | 311     | 83      |
| Listening                  | 10      | 22      | 320     | 148     |
| Concentration*             | 2       | 25      | 337     | 135     |
| Distracted                 | 1       | 10      | 307     | 182     |
| Organizing                 | 19      | 79      | 304     | 98      |
| Avoiding                   | 19      | 55      | 278     | 148     |
| Forgetful                  | 19      | 75      | 290     | 116     |
|                            |         |         |         |         |
| Interrupts                 | 28      | 73      | 305     | 94      |
| Acts Before Thinking       | 28      | 112     | 283     | 77      |
| Shifts Activities          | 72      | 134     | 247     | 47      |
| Blurts†                    | 135     | 82      | 232     | 48      |
| Difficulty Waiting Turn    | 80      | 172     | 200     | 48      |
|                            |         |         |         |         |
| Hyperactive                | 53      | 127     | 227     | 93      |
| Fidgeting                  | 15      | 47      | 301     | 137     |
| Difficulty Staying Seated  | 45      | 80      | 287     | 88      |
| On the Go                  | 49      | 89      | 255     | 107     |
| Talks Excess               | 37      | 77      | 255     | 131     |
| Difficulty Playing Quietly | 98      | 120     | 233     | 49      |

\*Concentration 1 record missing †Blurts 3 records missing. Scores 1 and 2 means that symptoms are within the normal range while scores 3 and 4 are excessive.

**Supplementary Table 3.** Sample Cohorts (Cases and Controls) Used in the Study and Source of Sample DNA

| Sample Source      | Array Platform | Number | Case/Control | DNA Source       |
|--------------------|----------------|--------|--------------|------------------|
| CHOP               | Illumina 550k  | 1,013  | Case         | Blood/Cell line  |
| NIMH               | Illumina 550k  | 128    | Case         | Blood            |
| Utah               | Illumina 550k  | 90     | Case         | Blood            |
| CHOP               | Illumina 550k  | 4,105  | Control      | Blood            |
| IMAGE              | Perlegen 600k  | 624    | Case         | Blood /Cell line |
| Psoriasis          | Perlegen 600K  | 1,600  | Control      | Blood /Cell line |
| Depression Control | Perlegen 600K  | 1,697  | Control      | Blood            |
| PUWMa              | Illumina 1M    | 864    | Case         | Blood            |
| SAGE               | Illumina 1M    | 2,211  | Control      | Blood            |
| PUWMa Parents      | Illumina 1M    | 1,258  | Control      | Blood            |
| IMAGEII            | Affymetrix 5.0 | 787    | Case         | Blood/Saliva     |
| IMAGEII (nonGAIN)  | Affymetrix 6.0 | 898    | Control      | Blood            |
| AGRE Parents       | Affymetrix 5.0 | 1,558  | Control      | Cell line        |

**Supplementary Table 4.** TDT Analysis of 397 ADHD Cases and Parents from CHOP genotyped on the Illumina HH550 chip.

| CHR | SNP        | BP        | A1 | A2 | T   | U   | OR     | CHISQ | P        |
|-----|------------|-----------|----|----|-----|-----|--------|-------|----------|
| 18  | rs8095193  | 58834095  | 1  | 2  | 167 | 92  | 1.815  | 21.72 | 3.16E-06 |
| 17  | rs4357980  | 13498634  | 1  | 2  | 99  | 174 | 0.569  | 20.6  | 5.65E-06 |
| 18  | rs8091710  | 72897492  | 1  | 2  | 29  | 73  | 0.3973 | 18.98 | 1.32E-05 |
| 14  | rs899116   | 97495185  | 1  | 2  | 101 | 172 | 0.5872 | 18.47 | 1.73E-05 |
| 13  | rs9595945  | 48099556  | 1  | 2  | 245 | 160 | 1.531  | 17.84 | 2.40E-05 |
| 4   | rs1018199  | 47927632  | 1  | 2  | 35  | 80  | 0.4375 | 17.61 | 2.71E-05 |
| 1   | rs3795324  | 157456184 | 2  | 1  | 91  | 157 | 0.5796 | 17.56 | 2.78E-05 |
| 3   | rs6444186  | 188156541 | 1  | 2  | 81  | 36  | 2.25   | 17.31 | 3.18E-05 |
| 9   | rs11144627 | 75654927  | 2  | 1  | 46  | 14  | 3.286  | 17.07 | 3.61E-05 |
| 8   | rs1462011  | 108104653 | 1  | 2  | 199 | 125 | 1.592  | 16.9  | 3.94E-05 |
| X   | rs5991935  | 100480088 | 1  | 2  | 22  | 59  | 0.3729 | 16.9  | 3.94E-05 |
| 7   | rs1013572  | 78350227  | 1  | 2  | 63  | 118 | 0.5339 | 16.71 | 4.35E-05 |
| 11  | rs952619   | 20316347  | 1  | 2  | 108 | 177 | 0.6102 | 16.71 | 4.37E-05 |
| 4   | rs7689018  | 85116479  | 1  | 2  | 41  | 87  | 0.4713 | 16.53 | 4.79E-05 |
| 18  | rs1943825  | 69128567  | 2  | 1  | 97  | 162 | 0.5988 | 16.31 | 5.37E-05 |
| 4   | rs4696821  | 8473961   | 1  | 2  | 210 | 135 | 1.556  | 16.3  | 5.39E-05 |
| 18  | rs1943823  | 69131624  | 2  | 1  | 157 | 237 | 0.6624 | 16.24 | 5.57E-05 |
| 4   | rs11724347 | 47923023  | 1  | 2  | 26  | 64  | 0.4062 | 16.04 | 6.19E-05 |
| 1   | rs7530899  | 76950752  | 2  | 1  | 89  | 151 | 0.5894 | 16.02 | 6.28E-05 |
| 18  | rs4890560  | 41457783  | 1  | 2  | 93  | 156 | 0.5962 | 15.94 | 6.54E-05 |
| 6   | rs2677099  | 45527900  | 1  | 2  | 220 | 144 | 1.528  | 15.87 | 6.79E-05 |
| 12  | rs11067228 | 113556980 | 2  | 1  | 231 | 153 | 1.51   | 15.84 | 6.88E-05 |
| 6   | rs2790102  | 45540192  | 1  | 2  | 222 | 146 | 1.521  | 15.7  | 7.44E-05 |
| 1   | rs4926757  | 48961624  | 1  | 2  | 192 | 122 | 1.574  | 15.61 | 7.80E-05 |
| 11  | rs17147479 | 84055504  | 1  | 2  | 137 | 79  | 1.734  | 15.57 | 7.93E-05 |
| 17  | rs9913261  | 12026365  | 2  | 1  | 89  | 150 | 0.5933 | 15.57 | 7.96E-05 |
| 9   | rs7041883  | 135352660 | 1  | 2  | 17  | 49  | 0.3469 | 15.52 | 8.19E-05 |
| 12  | rs7309946  | 103478293 | 2  | 1  | 119 | 188 | 0.633  | 15.51 | 8.22E-05 |
| 7   | rs10226468 | 42907176  | 2  | 1  | 144 | 219 | 0.6575 | 15.5  | 8.27E-05 |
| 5   | rs438418   | 2902436   | 2  | 1  | 78  | 36  | 2.167  | 15.47 | 8.37E-05 |
| 8   | rs12682232 | 108078371 | 2  | 1  | 199 | 128 | 1.555  | 15.42 | 8.63E-05 |
| X   | rs5956634  | 123092612 | 2  | 1  | 59  | 110 | 0.5364 | 15.39 | 8.74E-05 |
| 7   | rs7786719  | 42850356  | 1  | 2  | 133 | 205 | 0.6488 | 15.34 | 8.99E-05 |
| 6   | rs910586   | 45518290  | 1  | 2  | 221 | 146 | 1.514  | 15.33 | 9.04E-05 |
| 6   | rs9395010  | 44453984  | 1  | 2  | 152 | 91  | 1.67   | 15.31 | 9.11E-05 |
| 14  | rs11844273 | 97489409  | 1  | 2  | 100 | 163 | 0.6135 | 15.09 | 1.02E-04 |
| 2   | rs11904235 | 36288350  | 1  | 2  | 64  | 27  | 2.37   | 15.04 | 1.05E-04 |
| 11  | rs487518   | 131283728 | 1  | 2  | 150 | 225 | 0.6667 | 15    | 1.08E-04 |
| 6   | rs6920606  | 33105652  | 2  | 1  | 164 | 242 | 0.6777 | 14.99 | 1.08E-04 |
| 14  | rs2014525  | 97491178  | 1  | 2  | 109 | 174 | 0.6264 | 14.93 | 1.12E-04 |
| 11  | rs7948111  | 23403649  | 1  | 2  | 65  | 117 | 0.5556 | 14.86 | 1.16E-04 |
| 16  | rs12598067 | 60940038  | 2  | 1  | 65  | 117 | 0.5556 | 14.86 | 1.16E-04 |
| 6   | rs9472494  | 45559814  | 1  | 2  | 223 | 149 | 1.497  | 14.72 | 1.25E-04 |
| 7   | rs533486   | 99085345  | 2  | 1  | 163 | 240 | 0.6792 | 14.71 | 1.25E-04 |
| 8   | rs7835921  | 96345468  | 1  | 2  | 157 | 96  | 1.635  | 14.71 | 1.26E-04 |
| 4   | rs827019   | 8460842   | 2  | 1  | 69  | 122 | 0.5656 | 14.71 | 1.26E-04 |

CHR:Chromosome number, SNP:SNP identifier, A1:Minor allele code, A2:Major allele code, T:Transmitted minor allele count, U:Untransmitted allele count, OR:TDT odds ratio, CHISQ:TDT chi-square statistic, P:TDT asymptotic p-value



**Supplementary Table 5.** Case:Control Analysis of 735 ADHD Cases and 2,298 Unrelated Controls from CHOP genotyped on the Illumina HH550 chip.

| CHR | SNP        | BP        | A1 | A2 | F_A     | F_U      | OR     | CHISQ | P        |
|-----|------------|-----------|----|----|---------|----------|--------|-------|----------|
| 18  | rs16943400 | 23086102  | 1  | 2  | 0.02778 | 0.08875  | 0.2934 | 57.53 | 3.33E-14 |
| 3   | rs7649108  | 166136126 | 1  | 2  | 0.3156  | 0.2497   | 1.386  | 24.88 | 6.11E-07 |
| 6   | rs9390261  | 145283744 | 1  | 2  | 0.02585 | 0.009072 | 2.899  | 24.54 | 7.29E-07 |
| X   | rs4609327  | 37790223  | 2  | 1  | 0.1441  | 0.08032  | 1.928  | 24.48 | 7.50E-07 |
| X   | rs5917547  | 37803525  | 2  | 1  | 0.1578  | 0.09074  | 1.878  | 24.22 | 8.59E-07 |
| 16  | rs2278656  | 54885245  | 1  | 2  | 0.01443 | 0.04091  | 0.3432 | 22.04 | 2.67E-06 |
| 8   | rs17834541 | 2674349   | 2  | 1  | 0.1083  | 0.1565   | 0.6545 | 21.01 | 4.56E-06 |
| 19  | rs2081051  | 20866811  | 1  | 2  | 0.1382  | 0.1911   | 0.6786 | 21    | 4.60E-06 |
| 19  | rs399686   | 20772798  | 1  | 2  | 0.143   | 0.1962   | 0.6833 | 20.95 | 4.72E-06 |
| X   | rs5917937  | 39750534  | 2  | 1  | 0.1195  | 0.06572  | 1.929  | 20.93 | 4.76E-06 |
| 19  | rs10419820 | 20943636  | 2  | 1  | 0.1789  | 0.2357   | 0.7067 | 20.9  | 4.84E-06 |
| X   | rs10522011 | 32517409  | 1  | 2  | 0.05924 | 0.02509  | 2.447  | 19.48 | 1.02E-05 |
| 8   | rs11203872 | 17531028  | 2  | 1  | 0.4342  | 0.37     | 1.306  | 19.34 | 1.09E-05 |
| X   | rs9633179  | 3535471   | 2  | 1  | 0.1089  | 0.05969  | 1.925  | 19.24 | 1.15E-05 |
| 4   | rs10519629 | 143040375 | 2  | 1  | 0.1864  | 0.1398   | 1.409  | 18.81 | 1.44E-05 |
| 19  | rs7253306  | 20951939  | 2  | 1  | 0.219   | 0.2759   | 0.736  | 18.77 | 1.48E-05 |
| 13  | rs9569383  | 55299477  | 1  | 2  | 0.1415  | 0.1909   | 0.6984 | 18.64 | 1.58E-05 |
| 12  | rs12229174 | 62532933  | 1  | 2  | 0.06054 | 0.03502  | 1.776  | 18.56 | 1.64E-05 |
| 19  | rs6511169  | 20893589  | 1  | 2  | 0.1461  | 0.1961   | 0.7014 | 18.51 | 1.69E-05 |
| 11  | rs10833476 | 21190445  | 1  | 2  | 0.1224  | 0.08502  | 1.502  | 18.48 | 1.72E-05 |
| 2   | rs1821659  | 212064488 | 2  | 1  | 0.3109  | 0.2527   | 1.334  | 18.15 | 2.05E-05 |
| X   | rs2480443  | 53212284  | 2  | 1  | 0.06525 | 0.02994  | 2.262  | 18.1  | 2.09E-05 |
| 7   | rs1486173  | 45965025  | 2  | 1  | 0.1131  | 0.07764  | 1.515  | 17.91 | 2.32E-05 |
| 15  | rs4381545  | 93039961  | 2  | 1  | 0.2296  | 0.18     | 1.358  | 17.8  | 2.45E-05 |
| 7   | rs10265665 | 96175055  | 1  | 2  | 0.0619  | 0.0365   | 1.742  | 17.79 | 2.46E-05 |
| 10  | rs11593585 | 44391199  | 1  | 2  | 0.1286  | 0.09093  | 1.475  | 17.69 | 2.60E-05 |
| X   | rs4134188  | 17474194  | 1  | 2  | 0.1016  | 0.05571  | 1.917  | 17.62 | 2.69E-05 |
| 4   | rs11131363 | 63013616  | 2  | 1  | 0.2643  | 0.212    | 1.335  | 17.6  | 2.72E-05 |
| 19  | rs1469402  | 20738115  | 2  | 1  | 0.145   | 0.1934   | 0.7075 | 17.52 | 2.85E-05 |
| 11  | rs12279152 | 133861485 | 1  | 2  | 0.02653 | 0.01139  | 2.365  | 17.43 | 2.98E-05 |
| X   | rs5957334  | 119125665 | 2  | 1  | 0.06667 | 0.03136  | 2.206  | 17.13 | 3.49E-05 |
| X   | rs6632558  | 36075450  | 2  | 1  | 0.0812  | 0.04176  | 2.028  | 16.94 | 3.85E-05 |
| 1   | rs2057594  | 117348535 | 1  | 2  | 0.2483  | 0.1983   | 1.335  | 16.89 | 3.96E-05 |
| 8   | rs17834523 | 2672777   | 1  | 2  | 0.09592 | 0.1367   | 0.6699 | 16.84 | 4.06E-05 |
| 7   | rs10485959 | 78702412  | 2  | 1  | 0.3007  | 0.3595   | 0.7659 | 16.83 | 4.09E-05 |
| X   | rs5945330  | 152438289 | 2  | 1  | 0.08807 | 0.04698  | 1.959  | 16.63 | 4.55E-05 |
| 3   | rs16854851 | 145238402 | 1  | 2  | 0.02381 | 0.009916 | 2.435  | 16.62 | 4.56E-05 |
| 8   | rs2237826  | 17519195  | 2  | 1  | 0.4355  | 0.376    | 1.28   | 16.59 | 4.65E-05 |
| X   | rs16987407 | 35968032  | 2  | 1  | 0.1041  | 0.05857  | 1.868  | 16.5  | 4.87E-05 |
| X   | rs4089885  | 22878045  | 2  | 1  | 0.1193  | 0.07027  | 1.792  | 16.47 | 4.94E-05 |
| 1   | rs2024766  | 181385290 | 2  | 1  | 0.5027  | 0.4424   | 1.274  | 16.45 | 4.99E-05 |
| 4   | rs9312518  | 173526549 | 1  | 2  | 0.4639  | 0.4042   | 1.276  | 16.45 | 5.00E-05 |
| 4   | rs9997484  | 173517324 | 2  | 1  | 0.4639  | 0.4042   | 1.276  | 16.45 | 5.00E-05 |
| 17  | rs4338847  | 7870502   | 1  | 2  | 0.3102  | 0.3679   | 0.7725 | 16.35 | 5.28E-05 |
| 12  | rs17497206 | 113000660 | 2  | 1  | 0.1537  | 0.2011   | 0.7219 | 16.33 | 5.32E-05 |

CHR:Chromosome, SNP:SNP ID, BP:Physical position (base-pair), A1:Minor allele name (based on whole sample), F\_A:Frequency of this allele in cases, F\_U:Frequency of this allele in controls, A2:Major allele name, OR:Estimated odds ratio (for A1, i.e. A2 is reference), CHISQ:Basic allelic test chi-square (1df), P:Asymptotic p-value for this test.

**Supplementary Table 6.** TDT Analysis of 623 ADHD Cases and Parents from IMAGE genotyped on the Perlegen platform.

| CHR | SNP        | BP        | A1 | A2 | T   | U   | OR     | CHISQ | P        |
|-----|------------|-----------|----|----|-----|-----|--------|-------|----------|
| 12  | rs3782309  | 26750663  | 1  | 2  | 172 | 99  | 1.737  | 19.66 | 9.23E-06 |
| 5   | rs17144308 | 117965870 | 2  | 1  | 244 | 352 | 0.6932 | 19.57 | 9.70E-06 |
| 2   | rs7609261  | 80530821  | 2  | 1  | 199 | 297 | 0.67   | 19.36 | 1.08E-05 |
| 3   | rs1344870  | 21282405  | 2  | 1  | 16  | 52  | 0.3077 | 19.06 | 1.27E-05 |
| 18  | rs7244637  | 17876224  | 1  | 2  | 134 | 215 | 0.6233 | 18.8  | 1.45E-05 |
| 1   | rs3850879  | 48004718  | 1  | 2  | 226 | 143 | 1.58   | 18.67 | 1.56E-05 |
| 14  | rs2295426  | 58446208  | 2  | 1  | 209 | 307 | 0.6808 | 18.61 | 1.60E-05 |
| 16  | rs7204253  | 5576184   | 2  | 1  | 114 | 189 | 0.6032 | 18.56 | 1.64E-05 |
| 4   | rs1378945  | 25382295  | 2  | 1  | 212 | 310 | 0.6839 | 18.4  | 1.79E-05 |
| 3   | rs11915713 | 74568983  | 1  | 2  | 176 | 266 | 0.6617 | 18.33 | 1.86E-05 |
| 12  | rs11830382 | 41718893  | 2  | 1  | 198 | 122 | 1.623  | 18.05 | 2.15E-05 |
| 12  | rs4761641  | 93525817  | 2  | 1  | 137 | 215 | 0.6372 | 17.28 | 3.22E-05 |
| 5   | rs2043053  | 117958083 | 2  | 1  | 126 | 201 | 0.6269 | 17.2  | 3.36E-05 |
| 18  | rs12965880 | 22313077  | 1  | 2  | 235 | 333 | 0.7057 | 16.91 | 3.92E-05 |
| 9   | rs17306197 | 97862011  | 1  | 2  | 162 | 96  | 1.688  | 16.88 | 3.97E-05 |
| 8   | rs17668689 | 96254526  | 1  | 2  | 216 | 310 | 0.6968 | 16.8  | 4.16E-05 |
| 2   | rs4852567  | 80556890  | 2  | 1  | 206 | 298 | 0.6913 | 16.79 | 4.17E-05 |
| 13  | rs1002468  | 93085569  | 2  | 1  | 287 | 197 | 1.457  | 16.74 | 4.30E-05 |
| 1   | rs10873925 | 77234323  | 2  | 1  | 305 | 212 | 1.439  | 16.73 | 4.31E-05 |
| 16  | rs12596741 | 17345435  | 1  | 2  | 228 | 324 | 0.7037 | 16.7  | 4.39E-05 |
| 9   | rs2991298  | 3284851   | 2  | 1  | 81  | 142 | 0.5704 | 16.69 | 4.41E-05 |
| 14  | rs1427324  | 58434446  | 1  | 2  | 206 | 297 | 0.6936 | 16.46 | 4.96E-05 |
| 10  | rs11258682 | 13951273  | 1  | 2  | 204 | 130 | 1.569  | 16.4  | 5.14E-05 |
| 4   | rs10520276 | 175420068 | 2  | 1  | 216 | 140 | 1.543  | 16.22 | 5.63E-05 |
| 1   | rs17375519 | 179499648 | 1  | 2  | 75  | 133 | 0.5639 | 16.17 | 5.78E-05 |
| 1   | rs10800069 | 163296159 | 1  | 2  | 232 | 327 | 0.7095 | 16.14 | 5.87E-05 |
| 7   | rs13340504 | 75277632  | 1  | 2  | 142 | 82  | 1.732  | 16.07 | 6.10E-05 |
| 2   | rs6543239  | 104056246 | 2  | 1  | 251 | 349 | 0.7192 | 16.01 | 6.31E-05 |
| 2   | rs4664452  | 162762970 | 1  | 2  | 30  | 6   | 5      | 16    | 6.33E-05 |
| 4   | rs16889099 | 13341184  | 2  | 1  | 48  | 96  | 0.5    | 16    | 6.33E-05 |
| 5   | rs12520147 | 2000122   | 1  | 2  | 158 | 237 | 0.6667 | 15.8  | 7.04E-05 |
| 11  | rs10400283 | 23523711  | 1  | 2  | 222 | 314 | 0.707  | 15.79 | 7.07E-05 |
| 4   | rs1378946  | 25382548  | 1  | 2  | 197 | 284 | 0.6937 | 15.74 | 7.28E-05 |
| 3   | rs7372975  | 74602140  | 2  | 1  | 169 | 250 | 0.676  | 15.66 | 7.59E-05 |
| 17  | rs11654470 | 74388926  | 2  | 1  | 82  | 141 | 0.5816 | 15.61 | 7.79E-05 |
| 3   | rs9878591  | 121464488 | 1  | 2  | 107 | 173 | 0.6185 | 15.56 | 8.01E-05 |
| 12  | rs1553953  | 28724544  | 1  | 2  | 76  | 133 | 0.5714 | 15.55 | 8.06E-05 |
| 11  | rs7121790  | 45021541  | 1  | 2  | 171 | 252 | 0.6786 | 15.51 | 8.20E-05 |
| 12  | rs1452231  | 83750252  | 2  | 1  | 223 | 314 | 0.7102 | 15.42 | 8.60E-05 |
| 7   | rs194847   | 103560404 | 1  | 2  | 347 | 251 | 1.382  | 15.41 | 8.65E-05 |
| 2   | rs11902138 | 80565100  | 1  | 2  | 173 | 254 | 0.6811 | 15.37 | 8.86E-05 |
| 16  | rs12932714 | 80320240  | 1  | 2  | 150 | 226 | 0.6637 | 15.36 | 8.88E-05 |
| 1   | rs1015144  | 200004976 | 2  | 1  | 204 | 291 | 0.701  | 15.29 | 9.22E-05 |
| 22  | rs6009441  | 47873456  | 1  | 2  | 107 | 172 | 0.6221 | 15.14 | 9.97E-05 |
| 8   | rs4734069  | 104169047 | 1  | 2  | 275 | 191 | 1.44   | 15.14 | 9.97E-05 |
| 20  | rs2024946  | 61678306  | 2  | 1  | 112 | 61  | 1.836  | 15.03 | 1.06E-04 |

CHR:Chromosome number, SNP:SNP identifier, A1:Minor allele code, A2:Major allele code, T:Transmitted minor allele count, U:Untransmitted allele count, OR:TDT odds ratio, CHISQ:TDT chi-square statistic, P:TDT asymptotic p-value

**Supplementary Table 7.** SNP GWAS Significance of Top Ranked ADHD Associated SNPs Reported by Lesch and Zhou. A) ADHD TDT CHOP Illumina 550k data; B) ADHD Case:Control CHOP Illumina 550k data; C) ADHD IMAGE Perlegen 600k data.

A)

| CHR | SNP        | BP        | A1 | A2 | T   | U   | OR     | CHISQ    | P       |
|-----|------------|-----------|----|----|-----|-----|--------|----------|---------|
| 2   | rs2241685  | 1896290   | 1  | 2  | 72  | 62  | 1.161  | 0.7463   | 0.3877  |
| 2   | rs13395022 | 79793915  | 2  | 1  | 136 | 136 | 1      | 0        | 1       |
| 2   | rs2587695  | 120038047 | 1  | 2  | 183 | 197 | 0.9289 | 0.5158   | 0.4726  |
| 2   | rs2242073  | 208819551 | 2  | 1  | 108 | 106 | 1.019  | 0.01869  | 0.8913  |
| 2   | rs1110998  | 217169458 | 1  | 2  | 175 | 159 | 1.101  | 0.7665   | 0.3813  |
| 3   | rs10510238 | 2876647   | 2  | 1  | 84  | 93  | 0.9032 | 0.4576   | 0.4987  |
| 3   | rs9879164  | 54040611  | 2  | 1  | 185 | 198 | 0.9343 | 0.4413   | 0.5065  |
| 3   | rs2084358  | 57457928  | 2  | 1  | 182 | 198 | 0.9192 | 0.6737   | 0.4118  |
| 3   | rs10490808 | 59939739  | 2  | 1  | 175 | 204 | 0.8578 | 2.219    | 0.1363  |
| 3   | rs10510850 | 60542142  | 1  | 2  | 90  | 83  | 1.084  | 0.2832   | 0.5946  |
| 4   | rs755403   | 6507714   | 2  | 1  | 195 | 180 | 1.083  | 0.6      | 0.4386  |
| 4   | rs10516182 | 7143981   | 2  | 1  | 155 | 169 | 0.9172 | 0.6049   | 0.4367  |
| 4   | rs7697323  | 7801488   | 1  | 2  | 180 | 222 | 0.8108 | 4.388    | 0.03619 |
| 5   | rs173754   | 65102081  | 1  | 2  | 218 | 202 | 1.079  | 0.6095   | 0.435   |
| 5   | rs258082   | 66166352  | 1  | 2  | 199 | 205 | 0.9707 | 0.08911  | 0.7653  |
| 6   | rs160666   | 2719051   | 2  | 1  | 179 | 181 | 0.989  | 0.01111  | 0.9161  |
| 6   | rs2842643  | 41758714  | 2  | 1  | 180 | 149 | 1.208  | 2.921    | 0.08744 |
| 6   | rs3799977  | 44945334  | 2  | 1  | 209 | 183 | 1.142  | 1.724    | 0.1891  |
| 6   | rs8180608  | 89064414  | 2  | 1  | 178 | 218 | 0.8165 | 4.04     | 0.04442 |
| 6   | rs1358601  | 91532294  | 1  | 2  | 180 | 181 | 0.9945 | 0.00277  | 0.958   |
| 6   | rs6921403  | 154156020 | 2  | 1  | 86  | 90  | 0.9556 | 0.09091  | 0.763   |
| 7   | rs2237349  | 28536203  | 2  | 1  | 176 | 191 | 0.9215 | 0.6131   | 0.4336  |
| 7   | rs2002865  | 154132035 | 2  | 1  | 134 | 157 | 0.8535 | 1.818    | 0.1776  |
| 8   | rs6991017  | 5508780   | 2  | 1  | 127 | 126 | 1.008  | 0.003953 | 0.9499  |
| 8   | rs2248529  | 14657354  | 1  | 2  | 188 | 190 | 0.9895 | 0.01058  | 0.9181  |
| 8   | rs4961315  | 142110882 | 2  | 1  | 186 | 152 | 1.224  | 3.42     | 0.06441 |
| 9   | rs2418326  | 114759028 | 1  | 2  | 141 | 142 | 0.993  | 0.003534 | 0.9526  |
| 9   | rs2502731  | 128056111 | 2  | 1  | 170 | 178 | 0.9551 | 0.1839   | 0.668   |
| 14  | rs10483393 | 31530235  | 1  | 2  | 146 | 137 | 1.066  | 0.2862   | 0.5927  |
| 15  | rs2556560  | 42609135  | 2  | 1  | 169 | 171 | 0.9883 | 0.01176  | 0.9136  |
| 16  | rs8060494  | 78808972  | 2  | 1  | 190 | 174 | 1.092  | 0.7033   | 0.4017  |
| 17  | rs4790372  | 2701606   | 2  | 1  | 163 | 169 | 0.9645 | 0.1084   | 0.7419  |
| 17  | rs12453316 | 69027654  | 1  | 2  | 177 | 179 | 0.9888 | 0.01124  | 0.9156  |
| 19  | rs997669   | 34996323  | 2  | 1  | 201 | 183 | 1.098  | 0.8438   | 0.3583  |
| 20  | rs1555322  | 33312595  | 1  | 2  | 94  | 79  | 1.19   | 1.301    | 0.2541  |

**B)**

| CHR | SNP        | BP        | A1 | F_A     | F_U     | A2 | OR     | CHISQ     | P        |
|-----|------------|-----------|----|---------|---------|----|--------|-----------|----------|
| 2   | rs2241685  | 1896290   | 1  | 0.09116 | 0.09283 | 2  | 0.9802 | 0.03733   | 0.8468   |
| 2   | rs13395022 | 79793915  | 2  | 0.2088  | 0.2095  | 1  | 0.9961 | 0.002865  | 0.9573   |
| 2   | rs2587695  | 120038047 | 1  | 0.4973  | 0.4922  | 2  | 1.021  | 0.1161    | 0.7333   |
| 2   | rs2242073  | 208819551 | 2  | 0.1605  | 0.1568  | 1  | 1.029  | 0.1216    | 0.7273   |
| 2   | rs1110998  | 217169458 | 1  | 0.3116  | 0.2928  | 2  | 1.093  | 1.886     | 0.1697   |
| 3   | rs10510238 | 2876647   | 2  | 0.1293  | 0.1376  | 1  | 0.9304 | 0.6621    | 0.4158   |
| 3   | rs9879164  | 54040611  | 2  | 0.4218  | 0.4359  | 1  | 0.9441 | 0.9084    | 0.3406   |
| 3   | rs2084358  | 57457928  | 1  | 0.5184  | 0.4722  | 2  | 1.203  | 9.597     | 0.001949 |
| 3   | rs10490808 | 59939739  | 2  | 0.4068  | 0.4266  | 1  | 0.9218 | 1.8       | 0.1797   |
| 3   | rs10510850 | 60542142  | 1  | 0.1211  | 0.1116  | 2  | 1.097  | 1.001     | 0.3172   |
| 4   | rs755403   | 6507714   | 2  | 0.3985  | 0.3973  | 1  | 1.005  | 0.007242  | 0.9322   |
| 4   | rs10516182 | 7143981   | 2  | 0.2801  | 0.2954  | 1  | 0.9279 | 1.274     | 0.259    |
| 4   | rs7697323  | 7801488   | 1  | 0.3782  | 0.38    | 2  | 0.9927 | 0.0142    | 0.9051   |
| 5   | rs173754   | 65102081  | 1  | 0.4925  | 0.4915  | 2  | 1.004  | 0.004285  | 0.9478   |
| 5   | rs258082   | 66166352  | 1  | 0.4619  | 0.4521  | 2  | 1.04   | 0.4342    | 0.5099   |
| 6   | rs160666   | 2719051   | 2  | 0.2857  | 0.3025  | 1  | 0.9222 | 1.515     | 0.2183   |
| 6   | rs2842643  | 41758714  | 2  | 0.2932  | 0.2909  | 1  | 1.011  | 0.02797   | 0.8672   |
| 6   | rs3799977  | 44945334  | 2  | 0.4306  | 0.4076  | 1  | 1.099  | 2.452     | 0.1174   |
| 6   | rs8180608  | 89064414  | 2  | 0.4101  | 0.4441  | 1  | 0.8703 | 5.265     | 0.02176  |
| 6   | rs1358601  | 91532294  | 1  | 0.3852  | 0.3846  | 2  | 1.003  | 0.002076  | 0.9637   |
| 6   | rs6921403  | 154156020 | 2  | 0.1373  | 0.1405  | 1  | 0.9736 | 0.09408   | 0.7591   |
| 7   | rs2237349  | 28536203  | 2  | 0.4109  | 0.4082  | 1  | 1.011  | 0.03276   | 0.8564   |
| 7   | rs2002865  | 154132035 | 2  | 0.2075  | 0.217   | 1  | 0.9445 | 0.6065    | 0.4361   |
| 8   | rs6991017  | 5508780   | 2  | 0.1891  | 0.1873  | 1  | 1.012  | 0.02315   | 0.8791   |
| 8   | rs2248529  | 14657354  | 1  | 0.3604  | 0.363   | 2  | 0.9888 | 0.03305   | 0.8557   |
| 8   | rs4961315  | 142110882 | 2  | 0.2959  | 0.2995  | 1  | 0.983  | 0.06846   | 0.7936   |
| 9   | rs2418326  | 114759028 | 1  | 0.2534  | 0.252   | 2  | 1.007  | 0.01179   | 0.9135   |
| 9   | rs2502731  | 128056111 | 2  | 0.3626  | 0.3508  | 1  | 1.053  | 0.6767    | 0.4107   |
| 14  | rs10483393 | 31530235  | 1  | 0.2272  | 0.2203  | 2  | 1.041  | 0.3146    | 0.5749   |
| 15  | rs2556560  | 42609135  | 2  | 0.419   | 0.4215  | 1  | 0.9899 | 0.02811   | 0.8668   |
| 16  | rs8060494  | 78808972  | 2  | 0.3215  | 0.3228  | 1  | 0.9943 | 0.008131  | 0.9282   |
| 17  | rs4790372  | 2701606   | 2  | 0.3014  | 0.3112  | 1  | 0.9546 | 0.5122    | 0.4742   |
| 17  | rs12453316 | 69027654  | 1  | 0.3612  | 0.3662  | 2  | 0.9788 | 0.1193    | 0.7298   |
| 19  | rs997669   | 34996323  | 2  | 0.4023  | 0.3876  | 1  | 1.064  | 1.025     | 0.3114   |
| 20  | rs1555322  | 33312595  | 1  | 0.1279  | 0.1277  | 2  | 1.002  | 0.0004034 | 0.984    |

C)

| CHR | SNP        | BP        | A1 | A2 | T   | U   | OR     | CHISQ    | P      |
|-----|------------|-----------|----|----|-----|-----|--------|----------|--------|
| 1   | rs2281597  | 34132445  | 0  | 2  | 0   | 0   | NA     | NA       | NA     |
| 1   | rs642969   | 197590139 | 0  | 2  | 0   | 0   | NA     | NA       | NA     |
| 2   | rs2587695  | 120038287 | 1  | 2  | 320 | 294 | 1.088  | 1.101    | 0.2941 |
| 2   | rs2242073  | 208702290 | 2  | 1  | 185 | 182 | 1.016  | 0.02452  | 0.8756 |
| 3   | rs10510850 | 60542142  | 1  | 2  | 109 | 115 | 0.9478 | 0.1607   | 0.6885 |
| 3   | rs17233461 | 125807474 | 2  | 1  | 305 | 322 | 0.9472 | 0.4609   | 0.4972 |
| 4   | rs755403   | 6440543   | 2  | 1  | 296 | 278 | 1.065  | 0.5645   | 0.4525 |
| 4   | rs3857174  | 7089831   | 2  | 1  | 202 | 217 | 0.9309 | 0.537    | 0.4637 |
| 4   | rs7697323  | 7734317   | 1  | 2  | 269 | 278 | 0.9676 | 0.1481   | 0.7004 |
| 5   | rs1457720  | 110998762 | 2  | 1  | 247 | 260 | 0.95   | 0.3333   | 0.5637 |
| 6   | rs160666   | 2719051   | 2  | 1  | 248 | 262 | 0.9466 | 0.3843   | 0.5353 |
| 6   | rs3799977  | 44945334  | 2  | 1  | 302 | 282 | 1.071  | 0.6849   | 0.4079 |
| 6   | rs6921403  | 154105599 | 2  | 1  | 149 | 150 | 0.9933 | 0.003344 | 0.9539 |
| 8   | rs6991017  | 5508780   | 2  | 1  | 193 | 191 | 1.01   | 0.01042  | 0.9187 |
| 9   | rs2418326  | 116719295 | 1  | 2  | 236 | 210 | 1.124  | 1.516    | 0.2183 |
| 9   | rs2416606  | 119862757 | 2  | 1  | 264 | 262 | 1.008  | 0.007605 | 0.9305 |
| 10  | rs16928529 | 72652991  | 2  | 1  | 277 | 312 | 0.8878 | 2.08     | 0.1493 |
| 10  | rs11594082 | 72969259  | 1  | 2  | 126 | 138 | 0.913  | 0.5455   | 0.4602 |
| 10  | rs10786284 | 98125495  | 0  | 1  | 0   | 0   | NA     | NA       | NA     |
| 10  | rs515910   | 105956394 | 2  | 1  | 300 | 272 | 1.103  | 1.371    | 0.2417 |
| 11  | rs3893215  | 17721406  | 0  | 2  | 0   | 0   | NA     | NA       | NA     |
| 11  | rs10830468 | 87604834  | 0  | 2  | 0   | 0   | NA     | NA       | NA     |
| 12  | rs4964805  | 102716954 | 0  | 2  | 0   | 0   | NA     | NA       | NA     |
| 13  | rs7995215  | 93206507  | 1  | 2  | 279 | 317 | 0.8801 | 2.423    | 0.1196 |
| 14  | rs2239627  | 22705999  | 0  | 2  | 0   | 0   | NA     | NA       | NA     |
| 14  | rs10483286 | 24273582  | 0  | 2  | 0   | 0   | NA     | NA       | NA     |
| 16  | rs10514604 | 83003885  | 0  | 2  | 0   | 0   | NA     | NA       | NA     |
| 17  | rs2440129  | 6847295   | 0  | 2  | 0   | 0   | NA     | NA       | NA     |

**Supplementary Table 8.** ADHD Genotype GWAS of Glutamatergic Genes. The most significant SNP genotype association in each of the eight GRM gene regions. A) ADHD TDT CHOP Illumina 550k B) ADHD Case:Control CHOP Illumina 550k C) ADHD IMAGE Perlegen 600k.

**A)**

| CHR | SNP        | BP        | A1 | A2 | T   | U   | OR     | CHISQ | P        | Gene |
|-----|------------|-----------|----|----|-----|-----|--------|-------|----------|------|
| 11  | rs4237549  | 88407924  | 2  | 1  | 31  | 61  | 0.5082 | 9.783 | 0.001762 | GRM5 |
| 7   | rs17864159 | 126444172 | 1  | 2  | 22  | 46  | 0.4783 | 8.471 | 0.003609 | GRM8 |
| 6   | rs3887555  | 34177040  | 1  | 2  | 208 | 161 | 1.292  | 5.986 | 0.01442  | GRM4 |
| 7   | rs6943762  | 86047914  | 2  | 1  | 69  | 99  | 0.697  | 5.357 | 0.02064  | GRM3 |
| 3   | rs7623055  | 7485891   | 1  | 2  | 151 | 193 | 0.7824 | 5.128 | 0.02354  | GRM7 |
| 6   | rs362839   | 146721428 | 2  | 1  | 125 | 161 | 0.7764 | 4.531 | 0.03328  | GRM1 |
| 3   | rs4687770  | 51730105  | 2  | 1  | 114 | 94  | 1.213  | 1.923 | 0.1655   | GRM2 |
| 5   | rs2078183  | 178357150 | 2  | 1  | 190 | 210 | 0.9048 | 1     | 0.3173   | GRM6 |

**B)**

| CHR | SNP        | BP        | A1 | F_A     | F_U     | A2 | OR     | CHISQ | P        | Gene |
|-----|------------|-----------|----|---------|---------|----|--------|-------|----------|------|
| 3   | rs7623055  | 7485891   | 1  | 0.3582  | 0.4129  | 2  | 0.7936 | 15.48 | 8.35E-05 | GRM7 |
| 11  | rs1354411  | 88016449  | 2  | 0.03643 | 0.0566  | 1  | 0.6302 | 10.21 | 0.001396 | GRM5 |
| 7   | rs2283100  | 126643293 | 2  | 0.2281  | 0.193   | 1  | 1.235  | 9.527 | 0.002024 | GRM8 |
| 6   | rs1873250  | 34130718  | 2  | 0.2134  | 0.2455  | 1  | 0.8338 | 7.062 | 0.007873 | GRM4 |
| 7   | rs10952890 | 86193151  | 1  | 0.02753 | 0.03917 | 2  | 0.6945 | 4.782 | 0.02877  | GRM3 |
| 5   | rs2078183  | 178357150 | 2  | 0.4593  | 0.4897  | 1  | 0.8852 | 4.605 | 0.03189  | GRM6 |
| 6   | rs1983635  | 146707365 | 2  | 0.316   | 0.2917  | 1  | 1.122  | 3.515 | 0.06081  | GRM1 |
| 3   | rs4687592  | 51630896  | 1  | 0.03442 | 0.04041 | 2  | 0.8464 | 1.191 | 0.2752   | GRM2 |

**C)**

| CHR | SNP        | BP        | A1 | A2 | T   | U   | OR     | CHISQ | P       | Gene |
|-----|------------|-----------|----|----|-----|-----|--------|-------|---------|------|
| 6   | rs12206652 | 34173960  | 2  | 1  | 265 | 216 | 1.227  | 4.992 | 0.02547 | GRM4 |
| 11  | rs160195   | 87932621  | 2  | 1  | 302 | 253 | 1.194  | 4.326 | 0.03753 | GRM5 |
| 7   | rs11563486 | 126621501 | 1  | 2  | 130 | 162 | 0.8025 | 3.507 | 0.06112 | GRM8 |
| 3   | rs11717471 | 7599469   | 2  | 1  | 238 | 280 | 0.85   | 3.405 | 0.06498 | GRM7 |
| 6   | rs2300620  | 146745874 | 2  | 1  | 160 | 133 | 1.203  | 2.488 | 0.1147  | GRM1 |
| 7   | rs1468413  | 86271589  | 1  | 2  | 190 | 162 | 1.173  | 2.227 | 0.1356  | GRM3 |
| 5   | rs7725272  | 178338994 | 2  | 1  | 289 | 261 | 1.107  | 1.425 | 0.2325  | GRM6 |
| 3   | rs6445959  | 51747387  | 2  | 1  | 169 | 153 | 1.105  | 0.795 | 0.3726  | GRM2 |

**Supplementary Table 9.** ADHD CNV Family Based Transmission Disequilibrium and *de novo* Statistical Tests.

**A) Illumina CHOP Deletions Enriched for Inheritance**

| CNVR                     | Count SNPs | P TDT Del | Inh Del  | <i>de novo</i> Del | Par Del Not Inh | Gene             | Distance |
|--------------------------|------------|-----------|----------|--------------------|-----------------|------------------|----------|
| chr18:74258734-74260996  | 3          | 0.001953  | <b>9</b> | 0                  | 0               | <i>SALL3</i>     | 580267   |
| chr7:120092385-120099982 | 3          | 0.001953  | <b>9</b> | 0                  | 0               | <i>KCND2</i>     | 0        |
| chr4:92499956-92502794   | 8          | 0.001953  | <b>9</b> | 0                  | 0               | <i>KIAA1680</i>  | 0        |
| chr11:69755529-69759313  | 12         | 0.007813  | <b>7</b> | 0                  | 0               | <i>FADD</i>      | 24395    |
| chr4:42400885-42403451   | 15         | 0.007813  | <b>7</b> | 0                  | 0               | <i>ATP8A1</i>    | 47238    |
| chr5:104463047-104518786 | 17         | 0.007813  | <b>7</b> | 0                  | 0               | <i>NR_000039</i> | 0        |
| chr13:69637654-69666685  | 18         | 0.015625  | <b>6</b> | 0                  | 0               | <i>NR_002717</i> | 25969    |
| chr3:195971510-195982215 | 5          | 0.03125   | <b>5</b> | 1                  | 0               | <i>FAM43A</i>    | 80455    |
| chr19:44369918-44376749  | 3          | 0.03125   | <b>5</b> | 1                  | 0               | <i>LOC342897</i> | 2695     |
| chr1:2349841-2356176     | 4          | 0.03125   | <b>5</b> | 1                  | 0               | <i>PEX10</i>     | 15971    |
| chr21:45777720-45782727  | 3          | 0.03125   | <b>5</b> | 0                  | 0               | <i>SLC19A1</i>   | 0        |
| chr10:67748487-67785209  | 30         | 0.03125   | <b>5</b> | 0                  | 0               | <i>CTNNA3</i>    | 0        |

**B) Illumina CHOP Duplications Enriched for Inheritance**

| CNVR                    | Count SNPs | P TDT Dup | Inh Dup  | <i>de novo</i> Dup | Par Dup Not Inh | Gene              | Distance |
|-------------------------|------------|-----------|----------|--------------------|-----------------|-------------------|----------|
| chr20:59015708-59022667 | 4          | 0.007813  | <b>7</b> | 0                  | 0               | <i>CDH4</i>       | 238287   |
| chr12:72808323-72832667 | 5          | 0.015625  | <b>6</b> | 0                  | 0               | <i>BC061638</i>   | 0        |
| chr6:73021641-73023171  | 3          | 0.03125   | <b>5</b> | 0                  | 0               | <i>RIMS1</i>      | 0        |
| chr17:74089903-74106726 | 9          | 0.03125   | <b>5</b> | 0                  | 0               | <i>DNAHL1</i>     | 10904    |
| chr1:9243828-9310031    | 22         | 0.03125   | <b>5</b> | 0                  | 0               | <i>H6PD,SPSB1</i> | 0        |

**C) Illumina CHOP Deletions Enriched for *de novo***

| CNVR | Count | Inh | <i>de</i> | Par Del | Gene | Distance |
|------|-------|-----|-----------|---------|------|----------|
|------|-------|-----|-----------|---------|------|----------|

|                           | SNPs | Del | <i>nov</i><br><b>Del</b> | Not Inh |                                                                        |       |
|---------------------------|------|-----|--------------------------|---------|------------------------------------------------------------------------|-------|
| chr19:15992679-15997923   | 2    | 15  | <b>6</b>                 | 15      | <i>LOC126536</i>                                                       | 0     |
| chr22:38384374-38403731   | 8    | 4   | <b>4</b>                 | 13      | <i>CACNA1I</i>                                                         | 0     |
| chr17:71112486-71120734   | 4    | 12  | <b>3</b>                 | 16      | <i>KIAA1783</i>                                                        | 0     |
| chr12:55902280-55923860   | 3    | 9   | <b>3</b>                 | 19      | <i>NDUFA4L2,NXPH4,SHMT2,STAC3</i>                                      | 0     |
| chr16:87694595-87778383   | 16   | 32  | <b>2</b>                 | 21      | <i>AX748415,CDH15,LOC197322</i>                                        | 0     |
| chr18:65358832-65367619   | 18   | 33  | <b>2</b>                 | 21      | <i>DOK6</i>                                                            | 0     |
| chr17:74544687-74596676   | 20   | 5   | <b>1</b>                 | 8       | <i>C1QTNF1,CTRP1,DKFZp434P174,FLJ21865</i>                             | 0     |
| chr20:35485009-35485260   | 2    | 14  | <b>1</b>                 | 9       | <i>SRC</i>                                                             | 17774 |
| chr17:76554452-76570569   | 5    | 7   | <b>1</b>                 | 9       | <i>AK127919,KIAA1303</i>                                               | 0     |
| chr19:40353627-40354649   | 6    | 20  | <b>1</b>                 | 9       | <i>FXVD5</i>                                                           | 1002  |
| chr1:6071709-6289806      | 34   | 2   | <b>1</b>                 | 9       | <i>ACOT7,CHD5,GPR153,HES3,ICMT,KCNAB2,RNF207,RPL22</i>                 | 0     |
| chr21:44535630-44541978   | 5    | 10  | <b>1</b>                 | 10      | <i>AIRE</i>                                                            | 0     |
| chr9:137731051-137745745  | 6    | 10  | <b>1</b>                 | 10      | <i>KCNT1,SOHLH1</i>                                                    | 0     |
| chr19:14102205-14159442   | 7    | 14  | <b>1</b>                 | 11      | <i>ASF1B,BX537706,LPHN1</i>                                            | 0     |
| chr14:104256711-104750100 | 30   | 8   | <b>1</b>                 | 11      | <i>ADSSL1,AHNAK2,BRF1,CDCA4,GPR132,JAG2,KIAA0284,NUDT14,PLD4,SIVA1</i> | 0     |
| chr11:68514489-68538799   | 8    | 13  | <b>1</b>                 | 12      | <i>BC039516,MRGPRF</i>                                                 | 0     |

#### D) Illumina CHOP Duplications Enriched for *de novo*

| CNVR                     | Count<br>SNPs | Inh Dup | <i>de novo</i><br><b>Dup</b> | Par Dup<br>Not Inh | Gene                | Distance |
|--------------------------|---------------|---------|------------------------------|--------------------|---------------------|----------|
| chr19:59423491-59428132  | 12            | 74      | <b>3</b>                     | 38                 | <i>LILRB3,LIR-3</i> | 0        |
| chr5:180108611-180122934 | 13            | 17      | <b>1</b>                     | 11                 | <i>OR2Y1</i>        | 8947     |
| chr9:138606913-138647195 | 17            | 10      | <b>1</b>                     | 10                 | <i>AF161442</i>     | 15688    |



|                           |    |    |   |    |                                                     |   |
|---------------------------|----|----|---|----|-----------------------------------------------------|---|
| chr16:87399730-87430019   | 22 | 7  | 1 | 7  | APRT,CDT1,FLJ00319,GALNS                            | 0 |
| chr22:23994408-24235668   | 63 | 18 | 1 | 7  | BC004918,BC037884,BC040576,BC047380,LOC91353,LRP5L  | 0 |
| chr14:104225150-104339273 | 35 | 7  | 1 | 11 | ADSS,ADSSL1,AKT1,AX721091,C14orf151,C14orf173,SIVA1 | 0 |
| chr12:31248369-31298174   | 30 | 27 | 1 | 17 | OVOS2                                               | 0 |
| chr20:61642713-61668792   | 11 | 4  | 1 | 7  | C20orf195,PRIC285,SRMS                              | 0 |

#### E) Perlegen IMAGE Deletions Enriched for Inheritance

| CNVR                     | Count SNPs | P TDT Del | Inh Del | <i>de novo</i> Del | Par Del Not Inh | Gene            | Distance |
|--------------------------|------------|-----------|---------|--------------------|-----------------|-----------------|----------|
| chr7:19828746-19840916   | 7          | 0.041656  | 4       | 0                  | 11              | <i>MGC42090</i> | 49005    |
| chr2:180271795-180274556 | 5          | 0.003204  | 2       | 1                  | 13              | <i>ZNF533</i>   | 0        |
| chr14:79919894-79924934  | 5          | 0.03125   | 1       | 0                  | 7               | <i>BC039670</i> | 0        |

#### F) Perlegen IMAGE Duplications Enriched for Inheritance

| CNVR                    | Count SNPs | P TDT Dup | Inh Dup | <i>de novo</i> Dup | Par Dup Not Inh | Gene                      | Distance |
|-------------------------|------------|-----------|---------|--------------------|-----------------|---------------------------|----------|
| chr22:17361563-17369020 | 3          | 0.015625  | 6       | 0                  | 0               | <i>CR623368, KIAA1647</i> | 0        |
| chr15:30088094-30090949 | 3          | 0.03125   | 5       | 1                  | 0               | <i>CHRNA7</i>             | 19069    |
| chr7:71664963-71712086  | 5          | 0.03125   | 5       | 0                  | 0               | <i>MGC87315</i>           | 0        |

#### G) Perlegen IMAGE Deletions Enriched for *de novo*

| CNVR                     | Count SNPs | Inh Del | <i>de novo</i> Del | Par Del Not Inh | Gene          | Distance |
|--------------------------|------------|---------|--------------------|-----------------|---------------|----------|
| chr2:180271795-180274923 | 6          | 2       | 1                  | 13              | <i>ZNF533</i> | 0        |
| chr10:85445139-85446804  | 7          | 5       | 1                  | 7               | <i>GHITM</i>  | 442361   |

#### H) Perlegen IMAGE Duplications Enriched for *de novo*

| CNVR                     | Count SNPs | Inh Dup | <i>de novo</i> Dup | Par Dup Not Inh | Gene            | Distance |
|--------------------------|------------|---------|--------------------|-----------------|-----------------|----------|
| chr6:168234697-168295618 | 13         | 5       | 2                  | 8               | <i>FLJ00181</i> | 9639     |

|                         |    |    |          |    |          |       |
|-------------------------|----|----|----------|----|----------|-------|
| chr12:31276361-31285014 | 9  | 15 | <b>1</b> | 17 | OVOS2    | 26006 |
| chr10:47089854-47154881 | 31 | 11 | <b>1</b> | 17 | AK057316 | 0     |
| chr7:140018-162903      | 13 | 10 | <b>1</b> | 10 | AL137655 | 23529 |
| chr8:2437197-2492653    | 23 | 4  | <b>1</b> | 7  | BC045738 | 0     |

**Supplementary Table 10.** ADHD CNV Family Based Transmission Disequilibrium and *de novo* Statistical Tests.

| CNVR (hg18/B36/Mar2006)  | Type | P TDT Del | P TDT Dup | Inh Del | <i>de novo</i> Del | Par Del Not Inh | Inh Dup | <i>de novo</i> Dup | Par Dup Not Inh |
|--------------------------|------|-----------|-----------|---------|--------------------|-----------------|---------|--------------------|-----------------|
| chr7:126441593-126621501 | Del  | 1         | 1         | 0       | 0                  | 0               | 0       | 0                  | 0               |
| chr11:88269449-88351661  | Del  | 0.125     | 1         | 3       | 0                  | 0               | 0       | 0                  | 0               |
| chr3:7183953-7197236     | Del  | 0.25      | 1         | 2       | 0                  | 0               | 0       | 0                  | 0               |
| chr6:146657076-146694047 | Dup  | 1         | 1         | 0       | 0                  | 0               | 0       | 0                  | 0               |
| chr7:153495598-153564827 | Dup  | 0.205     | 1         | 4       | 0                  | 6               | 0       | 0                  | 0               |
| chr5:65027976-65046520   | Del  | 1         | 0.5       | 0       | 0                  | 0               | 1       | 0                  | 0               |
| chr1:56053497-56064495   | Del  | 1         | 1         | 0       | 0                  | 0               | 0       | 0                  | 0               |
| chr1:72317292-72328395   | Dup  | 1         | 1         | 0       | 0                  | 0               | 0       | 0                  | 0               |
| chr19:38427720-38444834  | Del  | 0.183     | 1         | 6       | 0                  | 8               | 0       | 0                  | 0               |
| chr3:1844168-1859889     | Del  | 0.063     | 1         | 4       | 0                  | 0               | 0       | 0                  | 0               |
| chr2:81419297-81446082   | Dup  | 1         | 0.5       | 0       | 0                  | 0               | 1       | 0                  | 0               |
| chr4:113772340-113788584 | Dup  | 0.375     | 1         | 2       | 0                  | 1               | 0       | 0                  | 0               |

**Supplementary Table 11.** Homozygous Deletion Analysis for CNVRs.

| CNVR                     | P-value  | OR       | Cases Deletion | Control Deletion | Gene                         | Exon Distance |
|--------------------------|----------|----------|----------------|------------------|------------------------------|---------------|
| chr4:64398956-64398956   | 0.010184 | 8.066572 | 5              | 2                | <i>SRD5A2L2</i>              | 427060        |
| chr4:87198171-87198951   | 0.012506 | 3.695184 | 8              | 7                | <i>MAPK10</i>                | 5492          |
| chr1:109169467-109173397 | 0.013403 | 0        | 3              | 0                | <i>AKNAD1</i>                | 0             |
| chr22:21254995-21262241  | 0.013403 | 0        | 3              | 0                | <i>DKFZp667J0810,abParts</i> | 905           |
| chr4:10007525-10009254   | 0.036934 | 1.320968 | 91             | 228              | <i>KIAA1729</i>              | 41348         |
| chr12:69160993-69162296* | 0.041022 | 0.638139 | 26             | 128              | <i>BC031864</i>              | 12619         |

\* significant control enrichment. Based on discovery cohort, subjects with a homozygous deletion detected included Cases: 711 and Controls: 2280.

**Supplementary Table 12.** Perlegen Data Reformatted File Samples to match Affymetrix Power Tools output format.

A) Genotype Calls File (0=AA,1=AB,2=BB,-1=NoCall).

| probeset_id    | 10009 | 10010 | 10021 | 10022 |
|----------------|-------|-------|-------|-------|
| SNP_rs10000023 | 1     | 1     | 2     | 1     |
| SNP_rs10000030 | 1     | 0     | 0     | 1     |
| SNP_rs10000037 | 0     | 0     | 1     | 1     |
| SNP_rs10000068 | 2     | 2     | 2     | 2     |

B) Genotype Calls Confidence Scores (All set to 1).

| probeset_id    | 10009 | 10010 | 10021 | 10022 |
|----------------|-------|-------|-------|-------|
| SNP_rs10000023 | 1     | 1     | 1     | 1     |
| SNP_rs10000030 | 1     | 1     | 1     | 1     |
| SNP_rs10000037 | 1     | 1     | 1     | 1     |
| SNP_rs10000068 | 1     | 1     | 1     | 1     |

C) Intensity Summary (-A=log<sub>10</sub>(X), -B=log<sub>10</sub>(Y) (X and Y value from dbGaP Single Sample Final Report files).

| probeset_id      | 10009 | 10010 | 10021 | 10022 |
|------------------|-------|-------|-------|-------|
| SNP_rs10000023-A | 2.85  | 2.78  | 2.07  | 2.89  |
| SNP_rs10000023-B | 2.86  | 2.84  | 2.98  | 2.96  |
| SNP_rs10000030-A | 2.9   | 2.99  | 2.95  | 3.02  |
| SNP_rs10000030-B | 2.91  | 2.4   | 2.38  | 3.05  |

**Supplementary Table 13.** Sample exclusion based on quality control measures.

| <b>Exclusion Criteria</b> | <b>CHOP</b> | <b>Control</b> |
|---------------------------|-------------|----------------|
| Call Rate < 98%           | 170         | 271            |
| SD LRR > 0.35             | 73          | 124            |
| Ethnicity non-Caucasian   | 71          | 48             |
| GCWF >0.05                | 251         | 1040           |
| Count CNVs > 70           | 197         | 237            |
| Monozygotic Twin          | 31          | 38             |

Samples excluded based on Quality Control (QC) measures on our HumanHap550 GWAS data based on statistical distributions to exclude poor quality DNA samples and false positive CNVs.

**Supplementary Table 14.** Sample Source Contributions to Impacting CNV Loci.

| CNVR                     | CHOP Cases | CHOP Controls | NIMH cases | Utah cases | IMAGE cases | Per Psoriasis Control | Per Depression Control | PUW Ma Cases | PUW Ma Parents | IMAGE II Cases | IMAGE II Controls | SAGE Illumina 1M Controls | AGRE Affy 5.0 Parents Controls | Type | Gene            |
|--------------------------|------------|---------------|------------|------------|-------------|-----------------------|------------------------|--------------|----------------|----------------|-------------------|---------------------------|--------------------------------|------|-----------------|
| chr11:88269449-88351661  | 4          | 0             | 0          | 0          | 5           | 0                     | 0                      | 1            | 1              | 0              | 0                 | 0                         | 0                              | Del  | <i>GRM5</i>     |
| chr7:126441593-126621501 | 3          | 0             | 0          | 0          | 3           | 0                     | 0                      | 2            | 0              | 0              | 0                 | 0                         | 0                              | Del  | <i>GRM8</i>     |
| chr3:7183953-7197236     | 4          | 0             | 0          | 0          | 2           | 0                     | 0                      | 0            | 0              | 0              | 0                 | 0                         | 0                              | Del  | <i>GRM7</i>     |
| chr6:146657076-146694047 | 5          | 2             | 1          | 1          | 0           | 0                     | 0                      | 0            | 0              | 1              | 0                 | 0                         | 0                              | Dup  | <i>GRM1</i>     |
| chr1:72317292-72328395   | 4          | 0             | 0          | 0          | 0           | 0                     | 0                      | 1            | 0              | 0              | 0                 | 0                         | 0                              | Dup  | <i>NEGR1</i>    |
| chr7:153495598-153564827 | 5          | 0             | 1          | 0          | 0           | 0                     | 0                      | 2            | 0              | 0              | 1                 | 0                         | 1                              | Dup  | <i>DPP6</i>     |
| chr5:65027976-65046520   | 4          | 0             | 0          | 0          | 1           | 0                     | 0                      | 0            | 0              | 1              | 1                 | 0                         | 0                              | Del  | <i>SGTB/NLN</i> |
| chr1:56053497-56064495   | 2          | 0             | 0          | 0          | 3           | 0                     | 0                      | 0            | 0              | 1              | 0                 | 0                         | 2                              | Del  | <i>USP24</i>    |
| chr19:38427720-38444834  | 5          | 2             | 0          | 0          | 1           | 0                     | 0                      | 1            | 3              | 0              | 0                 | 0                         | 0                              | Del  | <i>SLC7A10</i>  |
| chr3:1844168-1859889     | 4          | 0             | 0          | 0          | 0           | 0                     | 0                      | 2            | 2 (inh)        | 1              | 1                 | 4                         | 1                              | Del  | <i>CNTN4</i>    |
| chr2:81419297-81446082   | 2          | 0             | 0          | 0          | 1           | 0                     | 3                      | 0            | 0              | 1              | 0                 | 0                         | 0                              | Dup  | <i>CTNNA2</i>   |
| chr4:113772340-113788584 | 2          | 0             | 0          | 0          | 1           | 0                     | 0                      | 1            | 1              | 0              | 0                 | 1                         | 1                              | Dup  | <i>LARP7</i>    |

**Supplementary Table 15.** Boundaries of Individual CNVs in Table 1A and 1B.

| CNVR                     | Gene         | Type | Sample ID         | Region Called in Sample  | Exon Distance* | Sample Validation Run |
|--------------------------|--------------|------|-------------------|--------------------------|----------------|-----------------------|
| chr11:88269449-88351661  | <i>GRM5</i>  | Del  | 230-3             | chr11:88269449-88351661  | 5,858          | Y                     |
| chr11:88269449-88351661  | <i>GRM5</i>  | Del  | 230-4             | chr11:88269449-88351661  | 5,858          | Y                     |
| chr11:88269449-88351661  | <i>GRM5</i>  | Del  | 230-5             | chr11:88269449-88351661  | 5,858          | Y                     |
| chr11:88269449-88351661  | <i>GRM5</i>  | Del  | 497               | chr11:83876556-91038751  | 0              | Y                     |
| chr11:88269449-88351661  | <i>GRM5</i>  | Del  | 16794             | chr11:87996654-88837360  | 0              | Y                     |
| chr11:88269449-88351661  | <i>GRM5</i>  | Del  | 13304             | chr11:88109331-88827923  | 0              | Y                     |
| chr11:88269449-88351661  | <i>GRM5</i>  | Del  | 13270             | chr11:88115425-88481107  | 0              | Y                     |
| chr11:88269449-88351661  | <i>GRM5</i>  | Del  | 13761             | chr11:88305340-88385387  | 0              | Y                     |
| chr11:88269449-88351661  | <i>GRM5</i>  | Del  | 17580             | chr11:88305340-88385387  | 0              | N^                    |
| chr11:88269449-88351661  | <i>GRM5</i>  | Del  | M.Of.M.Cs.604401  | chr11:88324615-88342595  | 14,924         | Y                     |
| chr7:126441593-126621501 | <i>GRM8</i>  | Del  | 1953313026_A      | chr7:126532786-126536202 | 0              | Y                     |
| chr7:126441593-126621501 | <i>GRM8</i>  | Del  | 1965040688_A      | chr7:126463602-126478050 | 54,536         | Y                     |
| chr7:126441593-126621501 | <i>GRM8</i>  | Del  | 4011452014_A      | chr7:126532786-126536202 | 0              | Y                     |
| chr7:126441593-126621501 | <i>GRM8</i>  | Del  | 14125             | chr7:125660695-126036276 | 0              | N^                    |
| chr7:126441593-126621501 | <i>GRM8</i>  | Del  | 16794             | chr7:125660695-126036276 | 0              | N^                    |
| chr7:126441593-126621501 | <i>GRM8</i>  | Del  | 11804             | chr7:125679479-125937528 | 0              | N^                    |
| chr7:126441593-126621501 | <i>GRM8</i>  | Del  | 987314            | chr7:126503602-126563602 | 0              | Y                     |
| chr7:126441593-126621501 | <i>GRM8</i>  | Del  | 987124            | chr7:126463602-126603602 | 0              | Y                     |
| chr3:7183953-7197236     | <i>GRM7</i>  | Del  | 2023340146        | chr3:7053179-7144453     | 18,686         | Y                     |
| chr3:7183953-7197236     | <i>GRM7</i>  | Del  | 068-3             | chr3:7183954-7197236     | 20,599         | Y                     |
| chr3:7183953-7197236     | <i>GRM7</i>  | Del  | 068-4             | chr3:7183954-7197236     | 20,599         | Y                     |
| chr3:7183953-7197236     | <i>GRM7</i>  | Del  | 4079019863_A      | chr3:7183954-7197236     | 20,599         | Y                     |
| chr3:7183953-7197236     | <i>GRM7</i>  | Del  | 11891             | chr3:6979874-7003319     | 101,280        | Y                     |
| chr3:7183953-7197236     | <i>GRM7</i>  | Del  | 11923             | chr3:6980446-7001696     | 101,852        | Y                     |
| chr6:146657076-146694047 | <i>GRM1</i>  | Dup  | 388-3             | chr6:146657077-146675511 | 0              | Y                     |
| chr6:146657076-146694047 | <i>GRM1</i>  | Dup  | 387-3             | chr6:146657077-146675511 | 0              | Y                     |
| chr6:146657076-146694047 | <i>GRM1</i>  | Dup  | 386-3             | chr6:146657077-146675511 | 0              | Y                     |
| chr6:146657076-146694047 | <i>GRM1</i>  | Dup  | 4301337678_R02C01 | chr6:146657077-146675511 | 0              | Y                     |
| chr6:146657076-146694047 | <i>GRM1</i>  | Dup  | 4305910011_R01C02 | chr6:146657077-146675511 | 0              | Y                     |
| chr6:146657076-146694047 | <i>GRM1</i>  | Dup  | 1181              | chr6:146657077-146694047 | 0              | Y                     |
| chr6:146657076-146694047 | <i>GRM1</i>  | Dup  | 83158             | chr6:146657077-146694047 | 0              | Y                     |
| chr6:146657076-146694047 | <i>GRM1</i>  | Dup  | b3_SF_0181        | chr6:146685878-146701196 | 13,883         | Y                     |
| chr1:72317292-72328395   | <i>NEGR1</i> | Dup  | 230-3             | chr1:72317292-72328395   | 10,621         | Y                     |
| chr1:72317292-72328395   | <i>NEGR1</i> | Dup  | 230-4             | chr1:72317292-72328395   | 10,621         | Y                     |
| chr1:72317292-72328395   | <i>NEGR1</i> | Dup  | 230-5             | chr1:72317292-72328395   | 10,621         | Y                     |
| chr1:72317292-72328395   | <i>NEGR1</i> | Dup  | TD207.1           | chr1:71648994-73025013   | 0              | Y                     |
| chr1:72317292-72328395   | <i>NEGR1</i> | Dup  | M.Of.M.Cs.6308601 | chr1:72322424-72328395   | 10,621         | Y                     |
| chr7:153495598-153564827 | <i>DPP6</i>  | Dup  | 332-3             | chr7:153495598-153578582 | 54,698         | Y                     |
| chr7:153495598-153564827 | <i>DPP6</i>  | Dup  | 4079019863_A      | chr7:153495598-153564827 | 68,453         | Y                     |

|                          |                 |     |                   |                          |         |    |
|--------------------------|-----------------|-----|-------------------|--------------------------|---------|----|
| chr7:153495598-153564827 | <i>DPP6</i>     | Dup | 4193372403_B      | chr7:153495598-153554210 | 79,070  | Y  |
| chr7:153495598-153564827 | <i>DPP6</i>     | Dup | 4243114113_R01C02 | chr7:153495598-153577484 | 55,796  | Y  |
| chr7:153495598-153564827 | <i>DPP6</i>     | Dup | 1135              | chr7:153495598-153576455 | 56,825  | N^ |
| chr7:153495598-153564827 | <i>DPP6</i>     | Dup | 8201671744        | chr7:153118878-153338318 | 0       | Y  |
| chr7:153495598-153564827 | <i>DPP6</i>     | Dup | W.Of.F.Cs.140002  | chr7:153502896-153517548 | 115,317 | Y  |
| chr7:153495598-153564827 | <i>DPP6</i>     | Dup | W.Of.M.Cs.234002  | chr7:153545279-153559377 | 73,903  | Y  |
| chr5:65027976-65046520   | <i>SGTB/NLN</i> | Del | 067-3             | chr5:65027976-65046520   | 0       | Y  |
| chr5:65027976-65046520   | <i>SGTB/NLN</i> | Del | 117-3             | chr5:65027976-65046520   | 0       | Y  |
| chr5:65027976-65046520   | <i>SGTB/NLN</i> | Del | 152-3             | chr5:65027976-65046520   | 0       | Y  |
| chr5:65027976-65046520   | <i>SGTB/NLN</i> | Del | 1670639198_A      | chr5:65027976-65046520   | 0       | Y  |
| chr5:65027976-65046520   | <i>SGTB/NLN</i> | Del | 15962             | chr5:64483534-65101307   | 0       | Y  |
| chr5:65027976-65046520   | <i>SGTB/NLN</i> | Del | b11_SF_1055       | chr5:65020291-65030503   | 3,236   | Y  |
| chr1:56053497-56064495   | <i>USP24</i>    | Del | 4147907208_B      | chr1:56053497-56064495   | 80,234  | Y  |
| chr1:56053497-56064495   | <i>USP24</i>    | Del | 393-3             | chr1:56053497-56064495   | 80,234  | Y  |
| chr1:56053497-56064495   | <i>USP24</i>    | Del | 11411             | chr1:56040939-56132401   | 67,676  | Y  |
| chr1:56053497-56064495   | <i>USP24</i>    | Del | 11804             | chr1:56040939-56263366   | 67,676  | Y  |
| chr1:56053497-56064495   | <i>USP24</i>    | Del | 11727             | chr1:56053497-56064840   | 80,234  | Y  |
| chr1:56053497-56064495   | <i>USP24</i>    | Del | b2_SF_0094        | chr1:56051215-56057576   | 77,952  | Y  |
| chr19:38427720-38444834  | <i>SLC7A10</i>  | Del | 120-3             | chr19:38415546-38444834  | 6,998   | Y  |
| chr19:38427720-38444834  | <i>SLC7A10</i>  | Del | 224-3             | chr19:38415546-38444834  | 6,998   | Y  |
| chr19:38427720-38444834  | <i>SLC7A10</i>  | Del | 305-3             | chr19:38415545-38434210  | 6,997   | Y  |
| chr19:38427720-38444834  | <i>SLC7A10</i>  | Del | 134-4             | chr19:38418216-38444834  | 9,668   | Y  |
| chr19:38427720-38444834  | <i>SLC7A10</i>  | Del | 168-3             | chr19:38423641-38444834  | 15,093  | Y  |
| chr19:38427720-38444834  | <i>SLC7A10</i>  | Del | 11931             | chr19:38427721-38455315  | 19,173  | Y  |
| chr19:38427720-38444834  | <i>SLC7A10</i>  | Del | W.Of.F.Cs.121001  | chr19:38423391-38442154  | 14,843  | Y  |
| chr3:1844168-1859889     | <i>CNTN4</i>    | Del | 078-3             | chr3:1273990-1859889     | 0       | Y  |
| chr3:1844168-1859889     | <i>CNTN4</i>    | Del | 078-4             | chr3:1273990-1859889     | 0       | Y  |
| chr3:1844168-1859889     | <i>CNTN4</i>    | Del | 141-3             | chr3:1756625-1928413     | 187,137 | Y  |
| chr3:1844168-1859889     | <i>CNTN4</i>    | Del | 177-3             | chr3:1844168-1936623     | 178,927 | Y  |
| chr3:1844168-1859889     | <i>CNTN4</i>    | Del | M.Of.F.Cs.53701   | chr3:1793056-1956567     | 158,983 | Y  |
| chr3:1844168-1859889     | <i>CNTN4</i>    | Del | U.Of.F.Cs.852301  | chr3:1835561-1852134     | 263,416 | Y  |
| chr3:1844168-1859889     | <i>CNTN4</i>    | Del | b3_SF_0253        | chr3:1797102-1930071     | 185,479 | Y  |
| chr2:81419297-81446082   | <i>CTNNA2</i>   | Dup | 134-4             | chr2:81035643-81654296   | 0       | Y  |
| chr2:81419297-81446082   | <i>CTNNA2</i>   | Dup | 144-3             | chr2:81035643-81654296   | 0       | Y  |
| chr2:81419297-81446082   | <i>CTNNA2</i>   | Dup | 11484             | chr2:81419297-81446082   | 152,417 | Y  |
| chr2:81419297-81446082   | <i>CTNNA2</i>   | Dup | b10_SF_0900       | chr2:81352586-81386102   | 85,706  | Y  |
| chr4:113772340-113788584 | <i>LARP7</i>    | Dup | 303-3             | chr4:113744172-113798058 | 0       | Y  |
| chr4:113772340-113788584 | <i>LARP7</i>    | Dup | 314-3             | chr4:113744172-113798058 | 0       | Y  |
| chr4:113772340-113788584 | <i>LARP7</i>    | Dup | 17190             | chr4:113772340-113788584 | 0       | Y  |
| chr4:113772340-113788584 | <i>LARP7</i>    | Dup | M.Fa.M.Cs.6300503 | chr4:113769438-113801755 | 0       | Y  |

\*exon distance of '0' indicates that exon is impacted by the CNV

^ sample not available for qPCR validation (sample visually validated in Bead Studio).

**Supplementary Table 16.** Frequency of CNVs in GRM Receptor Interacting Genes in ADHD Cases and Controls.

| Gene           | Del Counts<br>(cases:controls) | Dup Counts<br>(cases:controls) | ADHD Enrichment |
|----------------|--------------------------------|--------------------------------|-----------------|
| <i>ACAT1</i>   | 0:0                            | 1:0                            | Yes             |
| <i>ACCN1</i>   | 0:0                            | 3:1                            | Yes             |
| <i>ACTR2</i>   | 1:0                            | 0:1                            | Yes             |
| <i>ADCY1</i>   | 0:0                            | 1:1                            | Yes             |
| <i>ADRBK1</i>  | 1:0                            | 0:0                            | Yes             |
| <i>ALDOA</i>   | 3:8                            | 2:6                            | Yes             |
| <i>APP</i>     | 0:0                            | 8:2                            | Yes             |
| <i>ARL15</i>   | 1:1                            | 2:0                            | Yes             |
| <i>ATXN7L3</i> | 1:1                            | 0:0                            | Yes             |
| <i>BDKRB2</i>  | 1:1                            | 0:0                            | Yes             |
| <i>CA8</i>     | 0:0                            | 1:0                            | Yes             |
| <i>CACNA1B</i> | 0:0                            | 2:2                            | Yes             |
| <i>CACYBP</i>  | 1:0                            | 0:0                            | Yes             |
| <i>CALM1</i>   | 1:2                            | 0:0                            | Yes             |
| <i>CHRM3</i>   | 0:0                            | 2:1                            | Yes             |
| <i>CIC</i>     | 1:1                            | 0:0                            | Yes             |
| <i>CNP</i>     | 1:2                            | 0:0                            | Yes             |
| <i>CRHR1</i>   | 1:0                            | 0:0                            | Yes             |
| <i>DISC1</i>   | 0:0                            | 4:7                            | Yes             |
| <i>DYNLL1</i>  | 0:0                            | 1:0                            | Yes             |
| <i>FPR1</i>    | 0:0                            | 1:1                            | Yes             |
| <i>GAPDH</i>   | 0:2                            | 1:1                            | Yes             |
| <i>GNA15</i>   | 1:1                            | 1:0                            | Yes             |
| <i>GNAI2</i>   | 2:4                            | 0:0                            | Yes             |
| <i>GNAO1</i>   | 0:0                            | 1:1                            | Yes             |
| <i>GNAQ</i>    | 1:0                            | 0:0                            | Yes             |
| <i>GRIK1</i>   | 0:0                            | 8:2                            | Yes             |
| <i>GRIK3</i>   | 1:0                            | 0:0                            | Yes             |
| <i>GRM1</i>    | 0:0                            | 7:2                            | Yes             |
| <i>GRM2</i>    | 1:0                            | 1:0                            | Yes             |
| <i>GRM3</i>    | 0:0                            | 1:0                            | Yes             |
| <i>GRM5</i>    | 4:0                            | 3:2                            | Yes             |
| <i>GRM6</i>    | 1:0                            | 0:4                            | Yes             |
| <i>GRM7</i>    | 4:0                            | 0:0                            | Yes             |
| <i>GRM8</i>    | 3:0                            | 1:1                            | Yes             |
| <i>GSN</i>     | 1:0                            | 1:0                            | Yes             |
| <i>HOMER1</i>  | 0:0                            | 1:0                            | Yes             |
| <i>HTR2A</i>   | 0:0                            | 1:0                            | Yes             |
| <i>MAPK1</i>   | 1:0                            | 0:0                            | Yes             |
| <i>MTHFD1</i>  | 1:1                            | 0:0                            | Yes             |
| <i>MX1</i>     | 0:0                            | 7:2                            | Yes             |
| <i>NARG1</i>   | 1:0                            | 0:0                            | Yes             |
| <i>NMI</i>     | 0:0                            | 1:0                            | Yes             |
| <i>PCBP3</i>   | 3:2                            | 6:3                            | Yes             |
| <i>PDE1C</i>   | 1:0                            | 1:1                            | Yes             |



|                  |      |      |              |
|------------------|------|------|--------------|
| <i>PPP2R1A</i>   | 0:0  | 1:0  | Yes          |
| <i>PRPSAP1</i>   | 1:0  | 1:1  | Yes          |
| <i>PSMD11</i>    | 2:24 | 1:0  | Yes          |
| <i>PSMD13</i>    | 0:4  | 1:2  | Yes          |
| <i>PXN</i>       | 0:0  | 1:0  | Yes          |
| <i>QRICH2</i>    | 1:1  | 0:1  | Yes          |
| <i>RANBP1</i>    | 2:3  | 0:9  | Yes          |
| <i>RAP2A</i>     | 0:0  | 1:1  | Yes          |
| <i>RCC1</i>      | 0:0  | 1:0  | Yes          |
| <i>RGS12</i>     | 2:0  | 0:0  | Yes          |
| <i>RIF1</i>      | 0:0  | 1:0  | Yes          |
| <i>RUVBL2</i>    | 1:0  | 0:3  | Yes          |
| <i>RYR1</i>      | 1:2  | 1:1  | Yes          |
| <i>RYR2</i>      | 1:0  | 1:0  | Yes          |
| <i>SDC3</i>      | 1:0  | 0:1  | Yes          |
| <i>SELE</i>      | 1:0  | 0:0  | Yes          |
| <i>SERPINB9</i>  | 0:0  | 1:0  | Yes          |
| <i>SETD4</i>     | 2:0  | 8:3  | Yes          |
| <i>SHANK1</i>    | 0:0  | 1:0  | Yes          |
| <i>SORD</i>      | 0:0  | 1:0  | Yes          |
| <i>STRAP</i>     | 0:0  | 1:1  | Yes          |
| <i>TK1</i>       | 2:0  | 0:2  | Yes          |
| <i>TNIK</i>      | 1:0  | 0:0  | Yes          |
| <i>VHL</i>       | 0:0  | 1:0  | Yes          |
| <i>BTBD2</i>     | 0:7  | 1:15 | No           |
| <i>ECHS1</i>     | 0:1  | 1:22 | No           |
| <i>F2RL3</i>     | 1:16 | 0:0  | No           |
| <i>GNB2L1</i>    | 0:0  | 0:4  | No           |
| <i>HOMER3</i>    | 1:12 | 1:9  | No           |
| <i>ITGB7</i>     | 0:5  | 1:12 | No           |
| <i>KIAA1683</i>  | 3:18 | 0:3  | No           |
| <i>PDE6G</i>     | 3:26 | 1:12 | No           |
| <i>PLCB3</i>     | 0:5  | 0:2  | No           |
| <i>PYGM</i>      | 3:29 | 0:4  | No           |
| <i>RPLP2</i>     | 8:92 | 1:6  | No           |
| <i>SLC6A3</i>    | 0:0  | 0:11 | No           |
| <i>SRC</i>       | 1:19 | 0:2  | No           |
| <i>TBCA</i>      | 1:10 | 0:0  | No           |
| <i>TRAF2</i>     | 5:24 | 1:11 | No           |
| <i>40425</i>     | 0:0  | 0:0  | NoSNPsOnGene |
| <i>ADRA2A</i>    | 0:0  | 0:0  | NoSNPsOnGene |
| <i>ADRA2C</i>    | 1:1  | 0:1  | NoSNPsOnGene |
| <i>C17orf44</i>  | 0:0  | 0:0  | NoSNPsOnGene |
| <i>C7orf25</i>   | 0:0  | 0:0  | NoSNPsOnGene |
| <i>F2RL2</i>     | 0:3  | 0:0  | NoSNPsOnGene |
| <i>FKBP3</i>     | 0:0  | 0:0  | NoSNPsOnGene |
| <i>FSCN1</i>     | 0:0  | 0:1  | NoSNPsOnGene |
| <i>GRB7</i>      | 0:0  | 0:0  | NoSNPsOnGene |
| <i>HSP90AB1</i>  | 1:0  | 0:0  | NoSNPsOnGene |
| <i>IMPDH2</i>    | 0:0  | 0:0  | NoSNPsOnGene |
| <i>LOC642393</i> | 0:0  | 1:4  | NoSNPsOnGene |
| <i>LOC653098</i> | 0:0  | 0:0  | NoSNPsOnGene |
| <i>MC4R</i>      | 0:0  | 0:0  | NoSNPsOnGene |
| <i>MGC11082</i>  | 0:0  | 0:0  | NoSNPsOnGene |
| <i>MRPS16</i>    | 0:0  | 0:0  | NoSNPsOnGene |
| <i>NPY2R</i>     | 1:0  | 0:0  | NoSNPsOnGene |
| <i>PAFAH1B3</i>  | 1:1  | 0:0  | NoSNPsOnGene |

|                 |       |      |              |
|-----------------|-------|------|--------------|
| <i>PCBP1</i>    | 0:0   | 0:0  | NoSNPsOnGene |
| <i>PCMT1</i>    | 0:0   | 0:0  | NoSNPsOnGene |
| <i>PHKG2</i>    | 0:0   | 0:0  | NoSNPsOnGene |
| <i>PRLHR</i>    | 0:0   | 0:0  | NoSNPsOnGene |
| <i>PSME1</i>    | 0:0   | 0:0  | NoSNPsOnGene |
| <i>RAB2</i>     | 2:2   | 0:1  | NoSNPsOnGene |
| <i>RGS2</i>     | 0:0   | 0:0  | NoSNPsOnGene |
| <i>S100A6</i>   | 0:0   | 0:0  | NoSNPsOnGene |
| <i>SET</i>      | 0:0   | 0:0  | NoSNPsOnGene |
| <i>SF3B14</i>   | 0:0   | 0:0  | NoSNPsOnGene |
| <i>TBXA2R</i>   | 10:44 | 0:10 | NoSNPsOnGene |
| <i>TMEM4</i>    | 0:0   | 0:0  | NoSNPsOnGene |
| <i>TPI1</i>     | 0:0   | 1:1  | NoSNPsOnGene |
| <i>TRMT112</i>  | 0:1   | 0:2  | NoSNPsOnGene |
| <i>TUBA1</i>    | 0:0   | 0:0  | NoSNPsOnGene |
| <i>TUBA1A</i>   | 0:0   | 0:0  | NoSNPsOnGene |
| <i>TUBA2</i>    | 0:1   | 0:0  | NoSNPsOnGene |
| <i>TUBB</i>     | 0:0   | 0:0  | NoSNPsOnGene |
| <i>TUBG1</i>    | 0:1   | 0:0  | NoSNPsOnGene |
| <i>ACAT2</i>    | 0:0   | 0:0  |              |
| <i>ACCN2</i>    | 0:2   | 0:0  |              |
| <i>ACP1</i>     | 0:0   | 0:3  |              |
| <i>ACTB</i>     | 0:0   | 0:0  |              |
| <i>ADA</i>      | 0:0   | 0:0  |              |
| <i>ADD1</i>     | 0:0   | 0:0  |              |
| <i>ADD2</i>     | 0:0   | 0:0  |              |
| <i>ADORA1</i>   | 0:0   | 0:1  |              |
| <i>ADRA1B</i>   | 0:0   | 0:0  |              |
| <i>ADRB2</i>    | 0:0   | 0:0  |              |
| <i>ANXA2</i>    | 0:0   | 0:0  |              |
| <i>APTX</i>     | 0:0   | 0:0  |              |
| <i>AQP1</i>     | 0:0   | 0:1  |              |
| <i>ARHGAP24</i> | 0:0   | 0:0  |              |
| <i>ARRB1</i>    | 0:0   | 0:0  |              |
| <i>ARRB2</i>    | 0:0   | 0:1  |              |
| <i>BDKRB1</i>   | 0:0   | 0:0  |              |
| <i>BTG2</i>     | 0:0   | 0:1  |              |
| <i>C1orf116</i> | 0:0   | 0:1  |              |
| <i>CALB2</i>    | 0:0   | 0:0  |              |
| <i>CALM2</i>    | 0:0   | 0:0  |              |
| <i>CALM3</i>    | 0:0   | 0:0  |              |
| <i>CAMK1</i>    | 0:0   | 0:0  |              |
| <i>CAMK2B</i>   | 0:0   | 0:0  |              |
| <i>CAMK4</i>    | 0:0   | 0:0  |              |
| <i>CCNB1</i>    | 0:0   | 0:0  |              |
| <i>CDC42</i>    | 0:0   | 0:0  |              |
| <i>CENTG1</i>   | 0:1   | 0:0  |              |
| <i>CHGB</i>     | 0:0   | 0:0  |              |
| <i>CHP</i>      | 0:0   | 0:0  |              |
| <i>CHRM2</i>    | 0:0   | 0:0  |              |
| <i>CMPK</i>     | 0:0   | 0:0  |              |
| <i>CNR1</i>     | 0:0   | 3:8  |              |
| <i>COPB2</i>    | 0:0   | 0:0  |              |
| <i>CYCS</i>     | 0:0   | 0:0  |              |
| <i>DCN</i>      | 0:0   | 0:0  |              |
| <i>DHCR7</i>    | 0:0   | 0:1  |              |
| <i>DLST</i>     | 0:0   | 0:0  |              |
| <i>DRD2</i>     | 0:0   | 0:0  |              |
| <i>DRD3</i>     | 0:0   | 0:0  |              |
| <i>DSTN</i>     | 0:0   | 0:0  |              |
| <i>EGFR</i>     | 0:0   | 0:0  |              |
| <i>EIF3S3</i>   | 0:0   | 0:1  |              |
| <i>ERBB2</i>    | 0:0   | 0:0  |              |

|                 |      |     |  |
|-----------------|------|-----|--|
| <i>F2R</i>      | 0:0  | 0:0 |  |
| <i>F3</i>       | 0:0  | 0:0 |  |
| <i>FURIN</i>    | 0:0  | 0:0 |  |
| <i>FYN</i>      | 0:0  | 0:0 |  |
| <i>GLP1R</i>    | 0:0  | 0:0 |  |
| <i>GLP2R</i>    | 0:0  | 0:0 |  |
| <i>GNAI1</i>    | 0:0  | 0:0 |  |
| <i>GNAI3</i>    | 0:0  | 0:0 |  |
| <i>GOT1</i>     | 0:0  | 0:0 |  |
| <i>GP1BA</i>    | 0:0  | 0:0 |  |
| <i>GPR26</i>    | 0:0  | 0:0 |  |
| <i>GRB2</i>     | 0:0  | 0:0 |  |
| <i>GRIA1</i>    | 0:0  | 0:0 |  |
| <i>GRM4</i>     | 0:0  | 0:0 |  |
| <i>HBXIP</i>    | 0:0  | 0:0 |  |
| <i>HD</i>       | 0:0  | 0:0 |  |
| <i>HNRPA3</i>   | 0:0  | 0:0 |  |
| <i>IL8RB</i>    | 0:0  | 0:0 |  |
| <i>IQGAP2</i>   | 0:0  | 0:0 |  |
| <i>ITGB1</i>    | 0:0  | 0:0 |  |
| <i>ITPR1</i>    | 0:0  | 0:0 |  |
| <i>KIAA0090</i> | 0:1  | 0:0 |  |
| <i>LAMA4</i>    | 0:0  | 0:0 |  |
| <i>LRP2BP</i>   | 0:3  | 0:0 |  |
| <i>LRRC59</i>   | 0:0  | 0:0 |  |
| <i>LTA</i>      | 0:0  | 0:0 |  |
| <i>LYAR</i>     | 0:0  | 0:0 |  |
| <i>LYN</i>      | 1:3  | 0:0 |  |
| <i>MAP4</i>     | 0:0  | 0:0 |  |
| <i>MAPT</i>     | 0:0  | 0:0 |  |
| <i>MARK4</i>    | 0:0  | 0:0 |  |
| <i>MRPL14</i>   | 0:0  | 0:0 |  |
| <i>MTNR1A</i>   | 0:3  | 0:0 |  |
| <i>MTNR1B</i>   | 0:0  | 0:0 |  |
| <i>MYC</i>      | 0:1  | 0:0 |  |
| <i>MYO6</i>     | 0:0  | 0:0 |  |
| <i>NANS</i>     | 0:0  | 0:0 |  |
| <i>NCK1</i>     | 0:0  | 0:0 |  |
| <i>NFKBIA</i>   | 0:0  | 0:0 |  |
| <i>NUDC</i>     | 0:0  | 0:1 |  |
| <i>OPRD1</i>    | 3:13 | 0:0 |  |
| <i>PCDHA4</i>   | 0:0  | 0:0 |  |
| <i>PCID1</i>    | 0:0  | 0:0 |  |
| <i>PDCD5</i>    | 0:0  | 0:0 |  |
| <i>PDE1B</i>    | 0:0  | 0:0 |  |
| <i>PGM1</i>     | 0:0  | 0:0 |  |
| <i>PHKB</i>     | 0:0  | 0:0 |  |
| <i>PICK1</i>    | 0:3  | 0:1 |  |
| <i>PIK3CA</i>   | 0:0  | 0:0 |  |
| <i>PIK3R1</i>   | 0:0  | 0:0 |  |
| <i>PLA2G7</i>   | 0:0  | 0:0 |  |
| <i>PLCB1</i>    | 0:0  | 0:0 |  |
| <i>PLCG2</i>    | 0:0  | 0:0 |  |
| <i>PPIH</i>     | 0:0  | 0:0 |  |
| <i>PRDX1</i>    | 0:0  | 0:0 |  |
| <i>PRKCA</i>    | 0:0  | 0:0 |  |
| <i>PRMT1</i>    | 0:0  | 0:1 |  |
| <i>PSAT1</i>    | 0:0  | 0:0 |  |
| <i>PSEN1</i>    | 0:0  | 0:0 |  |
| <i>PSMA1</i>    | 0:0  | 0:1 |  |
| <i>PSMC1</i>    | 0:0  | 0:0 |  |
| <i>PSMD1</i>    | 0:0  | 0:0 |  |
| <i>PSMD6</i>    | 0:0  | 0:0 |  |

|               |     |     |  |
|---------------|-----|-----|--|
| <i>PTHR2</i>  | 0:0 | 0:0 |  |
| <i>PYGL</i>   | 0:0 | 0:0 |  |
| <i>RALA</i>   | 0:0 | 0:0 |  |
| <i>RCC2</i>   | 0:0 | 0:0 |  |
| <i>RHOA</i>   | 0:0 | 0:0 |  |
| <i>RPA2</i>   | 0:0 | 0:0 |  |
| <i>RPN2</i>   | 0:0 | 0:0 |  |
| <i>RPS14</i>  | 0:0 | 0:0 |  |
| <i>RRM1</i>   | 0:0 | 0:0 |  |
| <i>SACS</i>   | 0:0 | 0:1 |  |
| <i>SARS</i>   | 0:0 | 0:0 |  |
| <i>SCTR</i>   | 0:0 | 0:0 |  |
| <i>SHBG</i>   | 0:0 | 0:0 |  |
| <i>SIAH1</i>  | 0:0 | 0:0 |  |
| <i>SLC2A1</i> | 0:0 | 0:0 |  |
| <i>SNCA</i>   | 0:0 | 0:0 |  |
| <i>SNRPB2</i> | 0:0 | 0:0 |  |
| <i>SOCS6</i>  | 0:0 | 0:0 |  |
| <i>SOCS7</i>  | 0:0 | 0:0 |  |
| <i>STAU1</i>  | 0:0 | 0:0 |  |
| <i>STX12</i>  | 0:0 | 0:0 |  |
| <i>SYK</i>    | 0:0 | 0:0 |  |
| <i>TCP1</i>   | 0:0 | 0:0 |  |
| <i>TEAD3</i>  | 0:0 | 0:0 |  |
| <i>TFAM</i>   | 0:0 | 0:0 |  |
| <i>TGM2</i>   | 0:0 | 0:3 |  |
| <i>TJP1</i>   | 0:0 | 0:2 |  |
| <i>TLR10</i>  | 0:0 | 0:0 |  |
| <i>TUBA1B</i> | 0:0 | 0:0 |  |
| <i>TXN</i>    | 0:0 | 0:0 |  |
| <i>TXNDC4</i> | 0:2 | 0:1 |  |
| <i>TXNL2</i>  | 0:0 | 0:1 |  |
| <i>TYMS</i>   | 0:0 | 0:2 |  |
| <i>UBQLN4</i> | 0:0 | 0:0 |  |
| <i>UCHL1</i>  | 0:0 | 0:0 |  |
| <i>VIPR1</i>  | 0:0 | 0:0 |  |
| <i>YWHAQ</i>  | 0:0 | 0:0 |  |
| <i>ZAP70</i>  | 0:0 | 0:0 |  |

**Supplementary Table 17.** Gene clusters based on the network of interacting genes.

| Cluster # | Genes                                                                                                                                                                                                                                                                                                                                                                                                                                                                                                                                        |
|-----------|----------------------------------------------------------------------------------------------------------------------------------------------------------------------------------------------------------------------------------------------------------------------------------------------------------------------------------------------------------------------------------------------------------------------------------------------------------------------------------------------------------------------------------------------|
| 1         | <i>SET, HNRPA3, RRM1, SORD, PSMC1, MTHFD1, CACYBP, PCBP1, TXNL2, 40425, SARS, PCID1, GSN, PSMD6, TBCA, MRPS16, RCC2, COPB2, RANBP1, PRMT1, ANXA2, FSCN1, RCC1, ACAT1, NUDC, EIF3S3, UCHL1, FKBP3, PDCD5, ACTR2, PSAT1, LYAR, PCBP3, SF3B14, LRRC59, ACP1, ACAT2, RUVBL2, GPR26, MAPK1, CYCS, MGC11082, STRAP, RAP2A, IMPDH2, ACTR2, PSMD1, SETD4, TRMT112, CMPK, MRPL14, SNRPB2, TEAD3, TMEM4, TFAM, DSTN, PRPSAP1, KIAA0090, PPIH, PSMA1, RPS14, DHCR7, PSMD13, TRAF2, TNIK, RPN2, TYMS, NCK1, NANS, NARG1, PPP2R1A, ECHS1, GOT1, PCMT1</i> |
| 2         | <i>GRB7, PYGL, CRHR1, PDE1C, CALM1, GLP1R, PYGM, PHKG2, PTHR2, PDE1B, GLP2R, ADD2, ADCY1, SCTR, PHKB, VIPR1, ADD1, PGM1, PGM1, IQGAP2</i>                                                                                                                                                                                                                                                                                                                                                                                                    |
| 3         | <i>HBXIP, S100A6, TXN, SLC2A1, CAMK1, RAB2, PCDHA4, QRICH2, GAPDH, BTBD2, PAFAH1B3, SERPINB9, PSMD11, PRDX1, RPA2, CAMK2B, LAMA4, ARL15, TPI1, CAMK4, TK1, FYN, PGM1, ACTB, CHP</i>                                                                                                                                                                                                                                                                                                                                                          |
| 4         | <i>SLC6A3, UBQLN4, PRLHR, PICK1, CIC, APTX, ERBB2, ATXN7L3, ACCN2, AQP1, GRIA1, ACCN1, ECHS1, SACS, BTG2, LRP2BP, PRKCA</i>                                                                                                                                                                                                                                                                                                                                                                                                                  |
| 5         | <i>RALA, CDC42, DRD3, ITGB1, ITGB7, TLR10, HSP90AB1, TJP1, FURIN, VHL, MTNR1B, PSEN1, SHBG, DCN, F3, GRIK3, GP1BA, RHOA, SELE, DRD2, ARHGAP24, MTNR1A, FKBP3, ARRB2, GRM8</i>                                                                                                                                                                                                                                                                                                                                                                |
| 6         | <i>NPY2R, RGS12, GNAI3, ADRA2C, GNAI2, GNAO1, CACNA1B, GNAI1, GRM6, IL8RB, PLCB3</i>                                                                                                                                                                                                                                                                                                                                                                                                                                                         |
| 7         | <i>ADRA2A, PDE6G, SRC, MC4R, ARRB1, SNCA, RPLP2, FPR1, BDKRB2, ADRBK1, OPRD1</i>                                                                                                                                                                                                                                                                                                                                                                                                                                                             |
| 8         | <i>PLCB1, TXNDC4, ITPR1, CCNB1, LYN, CA8, PLCG2</i>                                                                                                                                                                                                                                                                                                                                                                                                                                                                                          |
| 9         | <i>F2RL3, HTR2A, ADRA1B, F2R, RGS2, HTR2A, GNAQ, F2RL2, CHRM3, PIK3CA, BDKRB2, TBXA2R, BDKRB1</i>                                                                                                                                                                                                                                                                                                                                                                                                                                            |
| 10        | <i>GNB2L1, CNP, STAU1, CHGB, PSME1, SOCS7, DLST, ALDOA, SYK, SDC3, TUBB, TGM2, HD, MARK4, MAP4, MX1, TUBA1A, SOCS6, C7orf25, PLA2G7</i>                                                                                                                                                                                                                                                                                                                                                                                                      |
| 11        | <i>HOMER1, STX12, CENTG1, RYR2, LOC653098, HOMER3, C1orf116, SHANK1, RYR1</i>                                                                                                                                                                                                                                                                                                                                                                                                                                                                |
| 12        | <i>CNR1, GNA15, CHRM2, ADRB2</i>                                                                                                                                                                                                                                                                                                                                                                                                                                                                                                             |
| 13        | <i>DYNLL1, PIK3R1, NMI, TUBA2, PXN, TUBG1, NFKBIA, TUBA1B, YWHAQ</i>                                                                                                                                                                                                                                                                                                                                                                                                                                                                         |
| 14        | <i>HRPT2, RIF1, GRM3</i>                                                                                                                                                                                                                                                                                                                                                                                                                                                                                                                     |
| 15        | <i>CALM3, GRM5, MYO6, KIAA1683, GRM7, LOC642393, C17orf44, CALM2</i>                                                                                                                                                                                                                                                                                                                                                                                                                                                                         |
| 16        | <i>CALB2, TCP1, LTA, TUBA1, ZAP70</i>                                                                                                                                                                                                                                                                                                                                                                                                                                                                                                        |
| 17        | <i>ADA, ADORA1</i>                                                                                                                                                                                                                                                                                                                                                                                                                                                                                                                           |
